# Supplementary material
Source: Research Square preprint supplement (doi:10.21203/rs.3.rs-9469950/v1)
Supplement: Supplementary file 2 [file d990f7d72073c4d0daf439ab.docx]

**Supplementary Information**

**Interface-engineered high-entropy single-atom alloys with d-band center tuning for synergistic apoptosis and ferroptosis**

Siyi Li,1 Wei Zhang,2 Shiyu Zhang,1 Wubin Lv,1 Yuxuan Zhao,1 Zhenlin Qi,1 Fei He,1 Shili Gai,1 He Ding,1,3 and Piaoping Yang1

1 Key Laboratory of Superlight Materials and Surface Technology, Ministry of Education, College of Materials Science and Chemical Engineering, Harbin Engineering University, Harbin 150001, P. R. China

2 Department of Chemistry, Beijing University of Chemical Technology, Beijing, 100029 P. R. China

3 Yangtze Delta Region Advanced Research Institute, Harbin Engineering University, NanTong, 226000, China

Correspondence and requests for materials should be addressed to D.H. (E-mail: dinghe@hrbeu.edu.cn), P.Y (email: yangpiaoping@hrbeu.edu.cn )

The supplementary information includes:

1. Supplementary methods

2. Supplementary Figures (Fig. 1-21)

3. Supplementary Tables (Table. 1-3)

**1. Supplementary methods**

**Chemicals and materials**

Iron (III) nitrate nonahydrate ((Fe(NO3)3·9H2O, 99%), molybdenum(III) chloridecobalt (MoCl2·7H2O, 98%), cerium(III) chloride (CeCl2·2H2O, 98%), molybdenum acetylacetonate (C10H14MoO6), cerium acetylacetonate (Ce(C5H7O2)3·xH2O), sodium molybdate, 2-aminoterephthalic acid (98%), N, N-dimethylformamide (C3H7NO, 99.5%), triethanolamine (TEA, 98%), BPS (99%), and phosphonitrilic chloride trimer (98%) were acquired from Aladdin Biochemical Technology Co., Ltd. Further, TMB, TEMP (AR), DMPO (AR), DTNB (98%), GSH (98%), PI (98%), alcein AM (97%), TA, dimethyl sulfoxide (98%), and glutaric dialdehyde (25%) were purchased from Aladdin (Shanghai, China). In addition, MTT (97%), fluorescein isothiocyanate (FITC), DCFH-DA, singlet oxygen sensor green, tris(4,7-diphenyl-1,10-phenanthroline)-ruthenium(II) dichloride ([Ru(dpp)3]2+Cl2), AO, and JC-1 staining kit were supplied by Beyotime Co., Ltd. The RPMI cell medium and PBS were purchased from Thermo Fisher Scientific.

**Preparation of MIL-101(Fe)**

Fe(NO3)3·9H2O, 2-aminoterephthalic acid, and deionized water (DI water) with the molar ratio of 1:1:5 were mixed for 2 h at 4°C (denoted as A solutions). Then, the solutions were transferred to a Teflon-lined hydrothermal autoclave reactor and heated to 150°C for 12 h. Finally, MIL-101(Fe) nanoparticles were obtained by centrifugation (10,000 rpm for 10 min).

**Fabrication of CM@MIL@PZS-1, CM@MIL@PZS-2, CM@MIL@PZS-3.1 and CM@MIL@PZS-3.2.**

The as-synthesized MIL, BPS, and phosphonitrilic chloride trimers were dissolved separately in methanol. Solutions were mixed and stirred for 1 h. Then, TEA was added to the mixture. The CM@MIL@PZS-1, CM@MIL@PZS-2, and CM@MIL@PZS-3.1 were prepared by dissolving molybdenum chloride/cerium chloride, sodium molybdate/cerium chloride, and molybdenum acetylacetonate/cerium acetylacetonate, respectively, in equimolar amounts in a water/methanol mixed solvent, followed by adding to the mixture and stirring for 18 h. The CM@MIL@PZS-3.2 were synthesized by adjusting the amount of heterogeneous metal substances added. Catalysts were obtained after centrifugation and vacuum drying.

**Preparation of CF MESACs, MF MESACs, and CMF HESACs.**

The CMF HESACs catalysts were obtained after calcining for 3 h at 400°C. The CF MESACs and MF MESACs catalysts were synthesized through the same process, which differs from the addition of elements.

**Characterization**

TEM (Tecnai T20), XRD (Rigaku DMAX-2400), and FTIR (Nicolet Avatar 360) were used to characterize the morphology and crystalline structure. The XPS spectra were obtained using an ESCALAB 250 instrument for elemental valence analysis. ICP-OES was performed using an iCAP 6000 series spectrometer. TGA was performed using an HS-TGA-103 thermogravimetric analyzer. Zeta potentials were measured using a Malvern Zetasizer Nano XS900 system. UV-Vis absorbance spectra were obtained using a UV-1601 spectrophotometer, and the ESR spectra were obtained using an EMX1598 spectrometer. CLSM images were acquired by Leica SP8 instruments. FCM was performed using BD Accuri C6.

**DFT Calculations**

We used the DFT as implemented in the Vienna Ab initio simulation package in all calculations. The exchange-correlation potential is described by using the generalized gradient approximation of Perdew-Burke-Ernzerhof (GGA-PBE). The projector augmented-wave (PAW) method is employed to treat interactions between ion cores and valence electrons. The plane-wave cutoff energy was fixed to 500 eV. Given structural models were relaxed until the Hellmann–Feynman forces were smaller than −0.02 eV/Å and the change in energy was smaller than 10–5 eV. We constructed a 30 Å × 30 Å × 30 Å vacuum layer box to counteract the periodic effects of the reaction. During the relaxation, the Brillouin zone was represented by a Γ-centered k-point grid of 1×1×1. Grimme’s DFT-D3 methodology was used to describe the dispersion interactions among all the atoms in adsorption models.

**ROS-Generated Activity**

The ROS-generated activity evaluations of as-synthesized catalysts were conducted using TMB as substrates in the presence of H2O2 in PBS solution. To evaluate the enzymatic activity kinetics, as-synthesized catalysts, TMB, and H2O2 were added to PBS solution at room temperature and under irradiation, followed by measuring the absorbance at 652 nm after different reaction times. The Michaelis-Menten constant was calculated based on the Michaelis-Menten saturation curve.

**The GSH-Depleted Activity**

Evaluations of the as-synthesized catalysts were conducted using DTNB as a substrate in the presence of GSH in a PBS solution. After being irradiated with various times of NIR, the absorbance intensity of different groups was recorded after a specific reaction time.

**The O2 generation Performances**

The as-synthesized catalysts were dispersed in PBS under an N2 environment for 30 min to reduce their oxygen content. After mixing with H2O2, a dissolved O2 meter probe was sealed tight in the mixture and tested for its O2 solubility (mg L−1).

**Photothermal Effect Evaluation**

The CMF HESACs catalysts were tested under 808 nm irradiation for 10 min. Images were taken by a thermal camera. UV absorbance performances of MIL, CM@MIL@PZS, and CMF HESACs catalysts were first tested with UV-Vis. Temperature changes caused by different laser intensities were revealed using 1.0 mL of CMF HESACs solution. Under laser irradiation (808 nm, 0.8 W cm–2), solutions at various concentrations (25, 50, 100, 200, 300, and 400 μg mL–1) were tested. According to the studies of Roper’s report, the photothermal conversion efficiency (*η*) was calculated by:

where *T*max refers to the equilibrium temperature, *T*surr refers to the ambient temperature, *h* refers to the heat conversion coefficient, *s* refers to the surface area of a container, *I* represents the incident energy of the NIR laser (808 nm), and *Aλ* represents the absorbance of CMF HESACs catalysts at 808 nm of NIR irradiation. In addition, *Q*Dis represents the baseline energy input of the sample cell, and the specific formula is *Q*Dis = 5.4 × 10–4*I*. The value of *hs* was calculated by:

where m is the mass of the sample, *C*water is the heat capacity of water (4.2 J g–1 K–1), and τs is the time constant of the system. Substituting *hs* into the *η* equation, the conversion efficiency is obtained. Then, the stability was tested with three cycles of laser on-off experiments. The *in vivo* photothermal abilities were tested with CMF HESACs. After the catalysts were injected, NIR irradiation was given for 3 min.

**Cell culture**

The CT26 mammary and L929 fibroblast cell lines were seeded in the cell medium. The cell lines were incubated at 37°C under an atmosphere of 5% CO2.

***In Vitro* Cytotoxicity Evaluation**

The cytotoxicity effect of CM@MIL@PZS and CMF HESACs catalysts was studied *via* the MTT assay. CT26 cells were pre-seeded into a 96-well plate at 4 × 103 cells per well and treated with (1) Control, (2) NIR, (3) CM@MIL@PZS, (4) CMF HESACs, (5) CM@MIL@PZS + NIR, and (6) CMF HESACs + NIR. Groups with catalysts were co-incubated with catalysts for 4 h. Groups that contained NIR were irradiated with an NIR laser for 5 min. After removing the catalysts, the cells were incubated overnight at 37°C. The CT26 cells were washed with PBS, 20 µL of MTT solution (5 mg mL–1) added to each well, and stained for 4 h. The MTT solution was removed, and 150 µL DMSO was added for 10 min. Then, the living cells were counted with the absorbance of each well at 490 nm. The biocompatibility assay of L929 fibroblast cells was conducted with CMF HESACs catalysts under the same experimental conditions.

***In Vitro* ROS Detection**

Cells were grown in 6-well plates. Subsequently, treatment groups were set as (1) Control, (2) NIR, (3) CM@MIL@PZS, (4) CMF HESACs, (5) CM@MIL@PZS + NIR, and (6) CMF HESACs + NIR. After co-incubation with catalysts for 4 h, cells were gently digested and washed with PBS. Then, add 1 mL of DCFH-DA (2 μg mL–1) in each group and stain for 20 min. Finally, the cells were washed with PBS and analyzed using flow cytometry (FCM).

**Mitochondrial Integrity Assay**

For the mitochondrial integrity assay, CT26 cells underwent the same treatments as *in vitro* ROS detection. Then, according to the manufacturer's protocol, they were incubated with JC-1 staining solution and photographed by CLSM in the green channel for J-monomers and the red channel for J-aggregates separately.

**Assessment of Lysosomal Membrane Integrity**

CT26 cells were randomly seeded in a 6-well plate (1 × 105 cells per well) and allowed to adhere for 24 h. Subsequently, the medium was removed, and the disks were washed with PBS twice before treatment. After incubation, groups (2), (5), and (6) were exposed to NIR laser (0.8 W cm−2) for 5 min. After CT26 cells accepted the above treatments, 1 mL of AO solution (10 μM) was added and co-incubated for 20 min. Finally, the cells were washed thrice and imaged by a CLSM.

**Transcriptome Analyses**

CT26 cells were divided into two groups: the experimental group treated with CMF HESACs + NIR and the control group without any treatment. The mRNA was extracted and sent to Novogene Co., Ltd. (Beijing, China) for transcriptomic analysis. For transcriptomics analysis, the genes with corrected P < 0.05 and |foldchange| ≥ 2 were considered as DEGs.

**Western Blot Assays**

CT26 cells were pre-seeded in a 6-well culture plate (1 × 105 cells per well). For caspase3 assays, ACSL4, and GPX4 assays, the experiment was divided into four groups: (1) control; (2) CM@MIL@PZS + NIR; (3) CMF HESACs + NIR; and (4) CMF HESACs + NIR + Fer-1 + Z-VAD-FMK. The CT26 cells were then collected using trypsin and lysed in a lysis buffer. Then, the proteins were separated by SDS-PAGE gel electrophoresis and then transferred to a polyvinylidene fluoride membrane. After blocking with 5% dried skimmed milk for 1 h, the samples were stained with the corresponding primary antibody overnight and anti-beta actin antibody as the loading control, followed by incubation with the goat anti-rabbit Dylight-800 or goat anti-mouse Dylight-680 antibody for 1 h. Afterward, the membrane was visualized by an Odyssey CLx Image Studio.

**Cellular GSH Detection**

CT26 cells were seeded into 6-well culture plates at a density of 1 × 105 per well. Subsequently, the medium was removed, and the disks were washed with PBS twice before treatment. Then, the intracellular GSH concentrations were detected using a commercial Thiol TrackerTM Violet probe according to the manufacturer’s guidelines. Finally, the fluorescence images were recorded by a CLSM.

**Assessment of Lipid Peroxidation**

CT26 cells were seeded in 6-well plates for 12 h and then exposed to the above protocol treatments. They were then cultured with C11-BODIPY 581/591 dye (10 μM) for 30 min. The cells were imaged using a CLSM.

**Apoptosis Assay**

CT26 cells were randomly seeded in a 6-well plate (1 × 105 cells per well) and allowed to adhere for 24 h. Subsequently, the medium was removed, and the disks were washed with PBS twice before treatment.

***In Vivo* Biodistribution of As-synthesized Catalysts**

Female BALB/c mice were intravenously (i.v.) injected with CMF HESACs catalysts (100 μL, 15 mg kg−1). At the planned time points (1, 3, 6, 12, 24, and 48 h), the mice were euthanized to collect the tumors and other major organs, including the liver, spleen, kidney, heart, lung, and tumor for biodistribution analysis *via* ICP-OES.

***In Vivo* Therapeutic Evaluation**

CT26 tumor-bearing mice were randomly divided into six groups as follows: (1) Control, (2) NIR, (3) CM@MIL@PZS, (4) CMF HESACs, (5) CM@MIL@PZS + NIR, and (6) CMF HESACs + NIR. Afterward, the body weights and tumor volume were recorded every 2 d. For the mice in the groups (3), (4), (5), and (6), 100 μL of various agents were i.v. injected. At 4 h post-injection every time, the tumors of groups (2), (5), and (6) were irradiated with a NIR laser (0.8 W cm−2, 3 min). The tumor volume (mm3) was obtained according to V = lw2/2, in which w and l represent the width and length of the tumor, respectively. After 14 d of the treatment, female BALB/c mice from different experimental groups were sacrificed for histopathological analysis. To evaluate the *in vivo* photothermal heating performance of as-synthesized catalysts, infrared thermal images and the temperature variation of mice were recorded at 4 h post-injection and irradiated with an NIR laser (0.8 W cm−2, 3 min) using an IR thermal camera.

**Animals and Tumor Model**

All animal experiments were approved by the Drug Safety Evaluation Centre of Harbin Medical University. Healthy male BALB/c nude mice (4–6 weeks old) were obtained from Liaoning Changsheng Biotechnology Co. To establish the xenograft model, CT26 cells (1 × 106) were dispersed in 50 μL of PBS solution for subcutaneous injection into the right axillary fossa of the mice. All *in vivo* experiments were initiated when the tumor volume reached 60−80 mm3.

**Histochemical Analyses**

After the therapeutic process, tumor tissues of mice in each treatment group were collected, fixed in 37% formalin, and embedded in paraffin for 1 d. Then, paraffin-embedded tumor sections (4 μm) were cut using a microtome (Leica RM2235, Germany). For the pathological investigation, the obtained samples were stained with H&E according to the standard protocol, and the slides were visualized on a CLSM.

**Animals and Tumor Model**

All animal experiments were approved by the Drug Safety Evaluation Centre of Harbin Medical University. Healthy male BALB/c nude mice (4–6 weeks old) were obtained from Liaoning Changsheng Biotechnology Co. To establish the xenograft model, CT26 cells (1 × 106) were dispersed in 50 μL of PBS solution for subcutaneous injection into the right axillary fossa of the mice. All *in vivo* experiments were initiated when the tumor volume reached 60−80 mm3.

**Statistical Analysis**

All data were exhibited as mean ± standard deviation (S.D.) and obtained from at least three independent repeated experiments. The results were analyzed using Student's t-test. One-way ANOVA was used to perform the statistical analysis. **P* < 0.05, ***P* < 0.01, ****P* < 0.001 were used to display significant differences.

**2. Supplementary Figures**


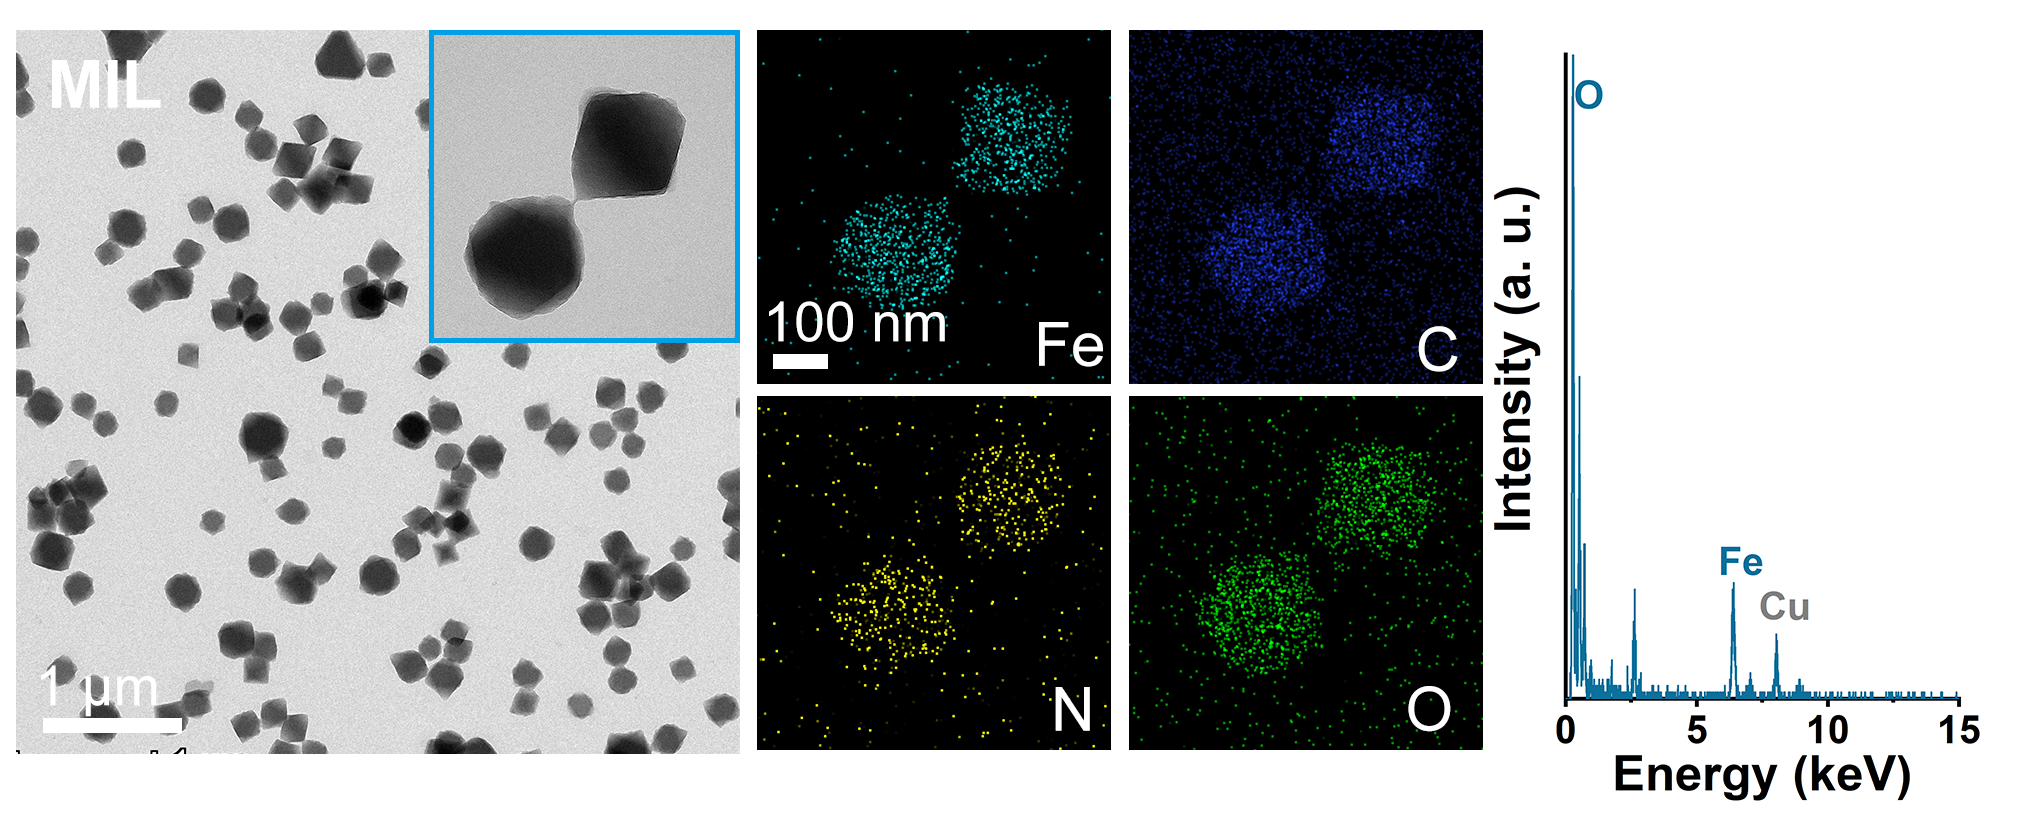


**Supplementary Fig. 1.** TEM images, elemental mapping profiles, and EDS data of MIL catalysts.


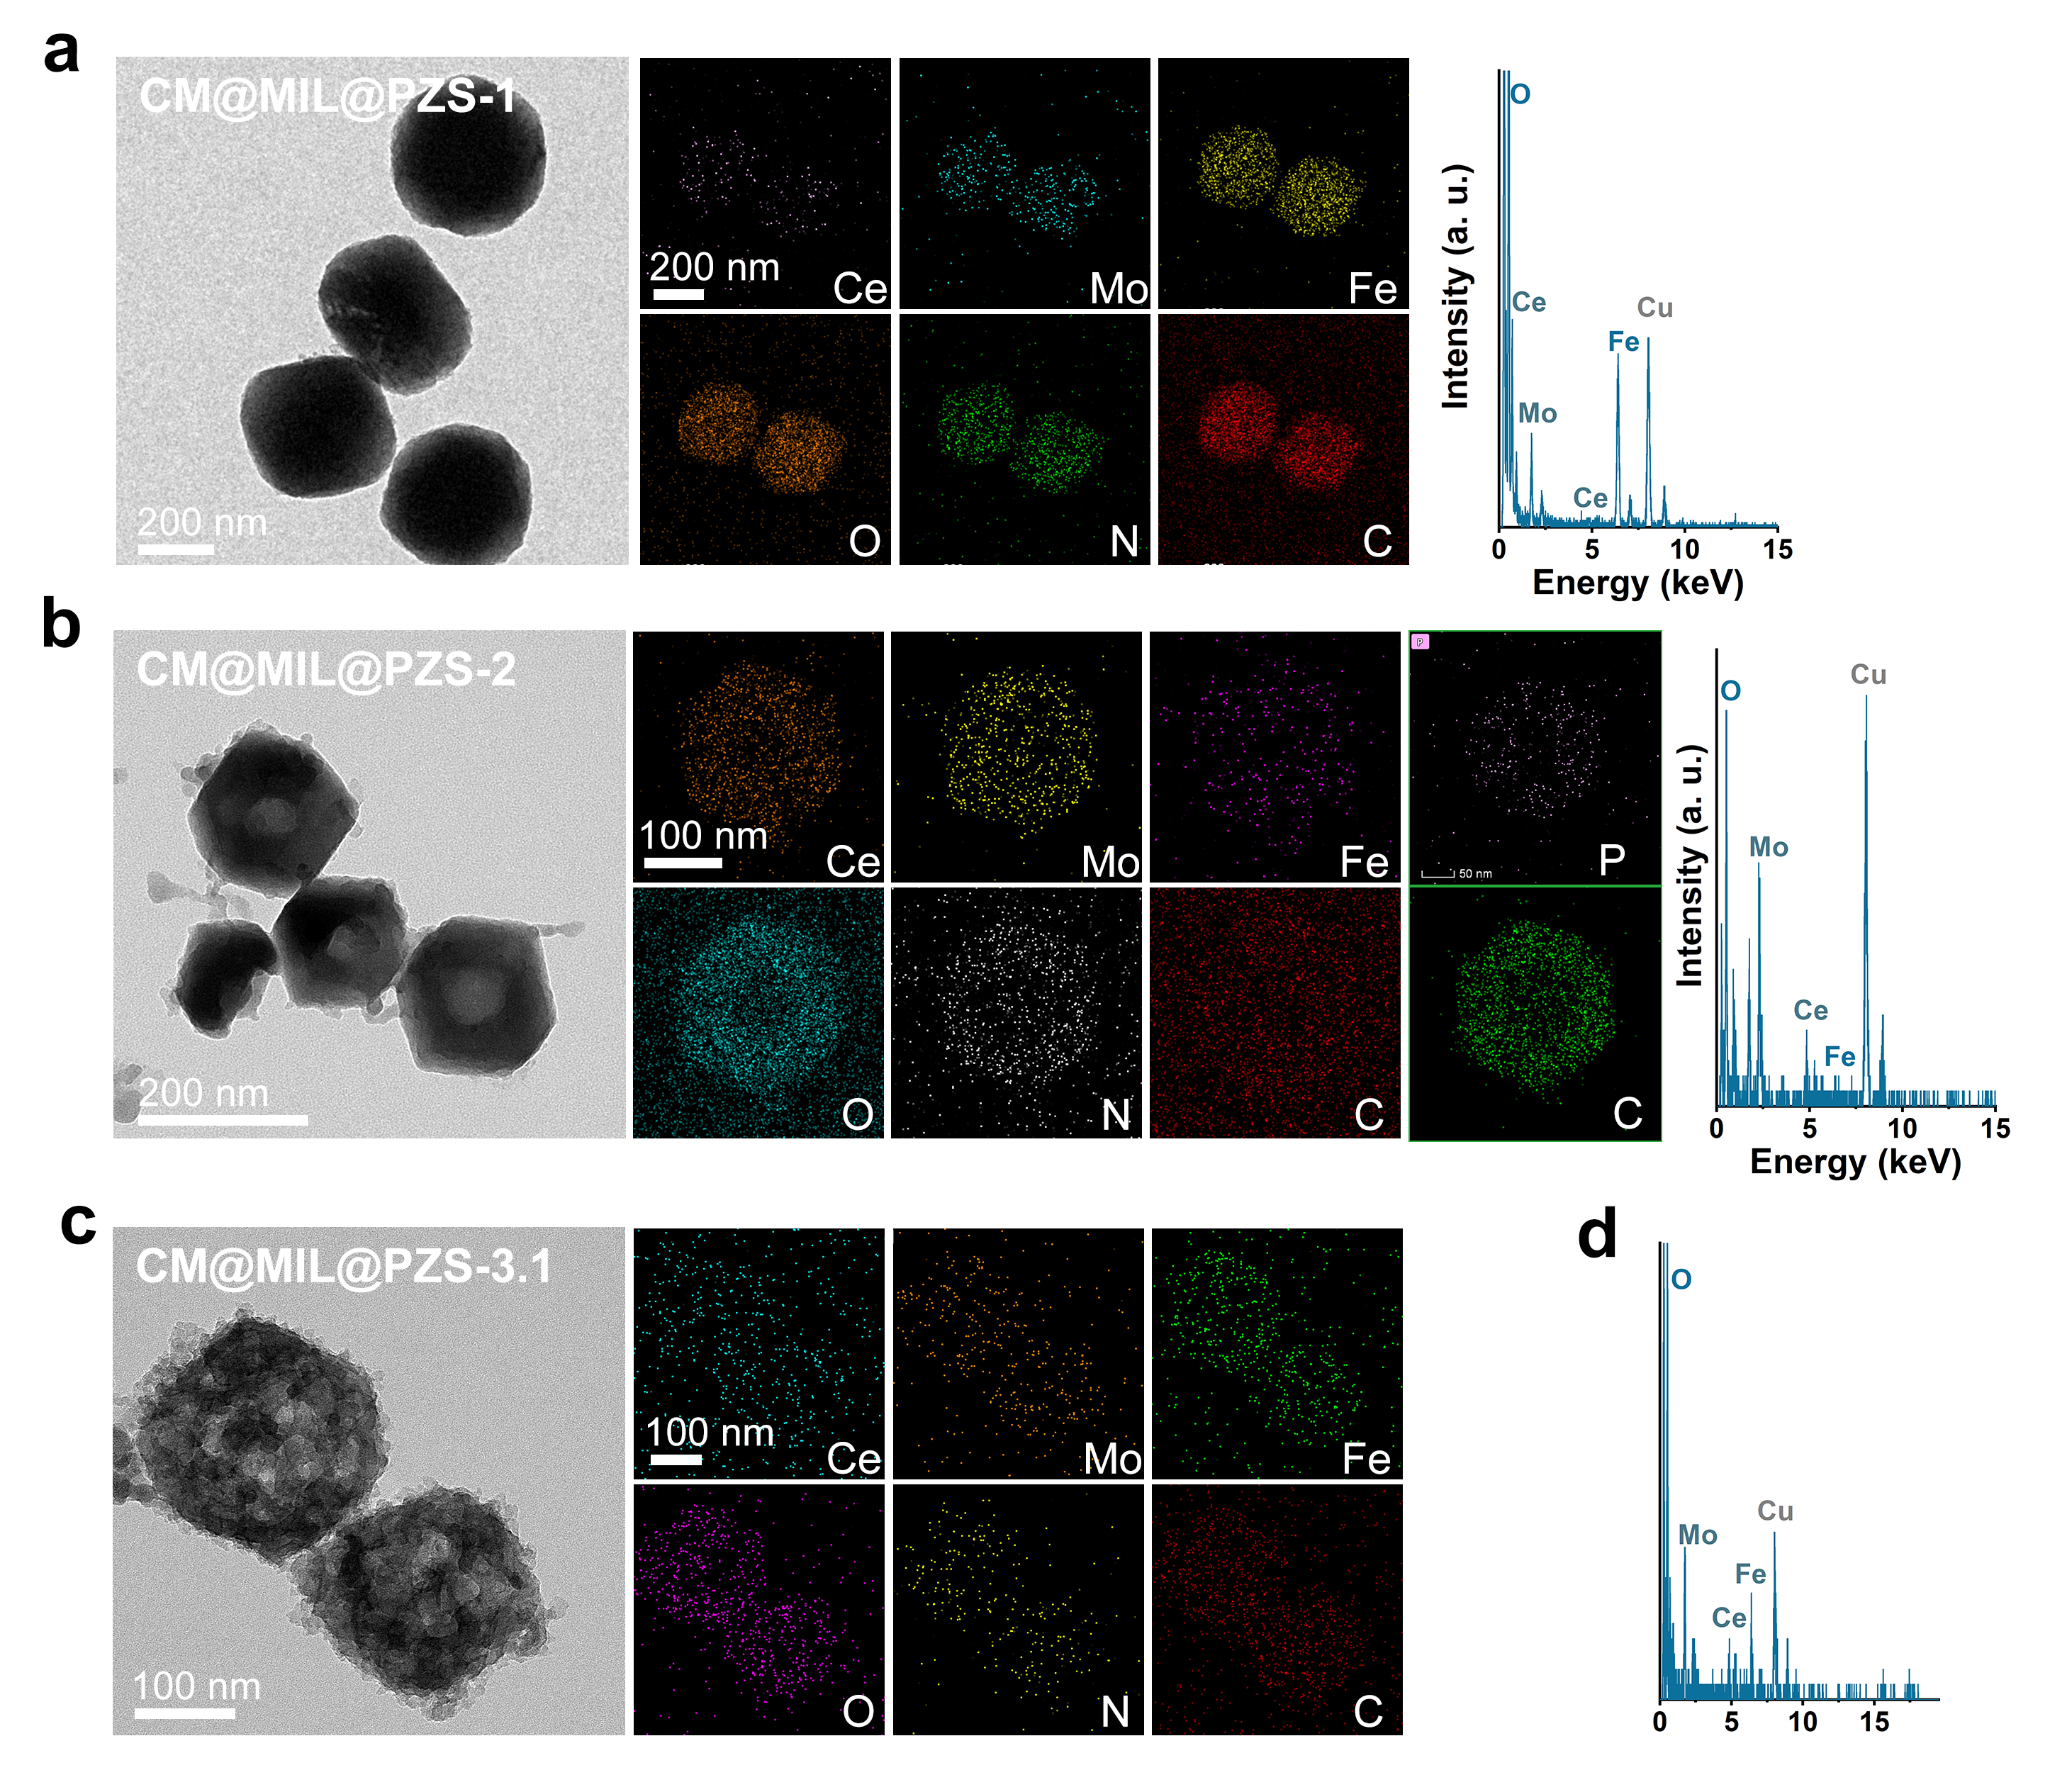


**Supplementary Fig. 2**. (a-b) TEM images, elemental mapping profiles, and EDS data of CM@MIL@PZS-1 and CM@MIL@PZS-2 catalysts. (c) TEM images and elemental mapping profiles of CM@MIL@PZS-3.1 catalysts.


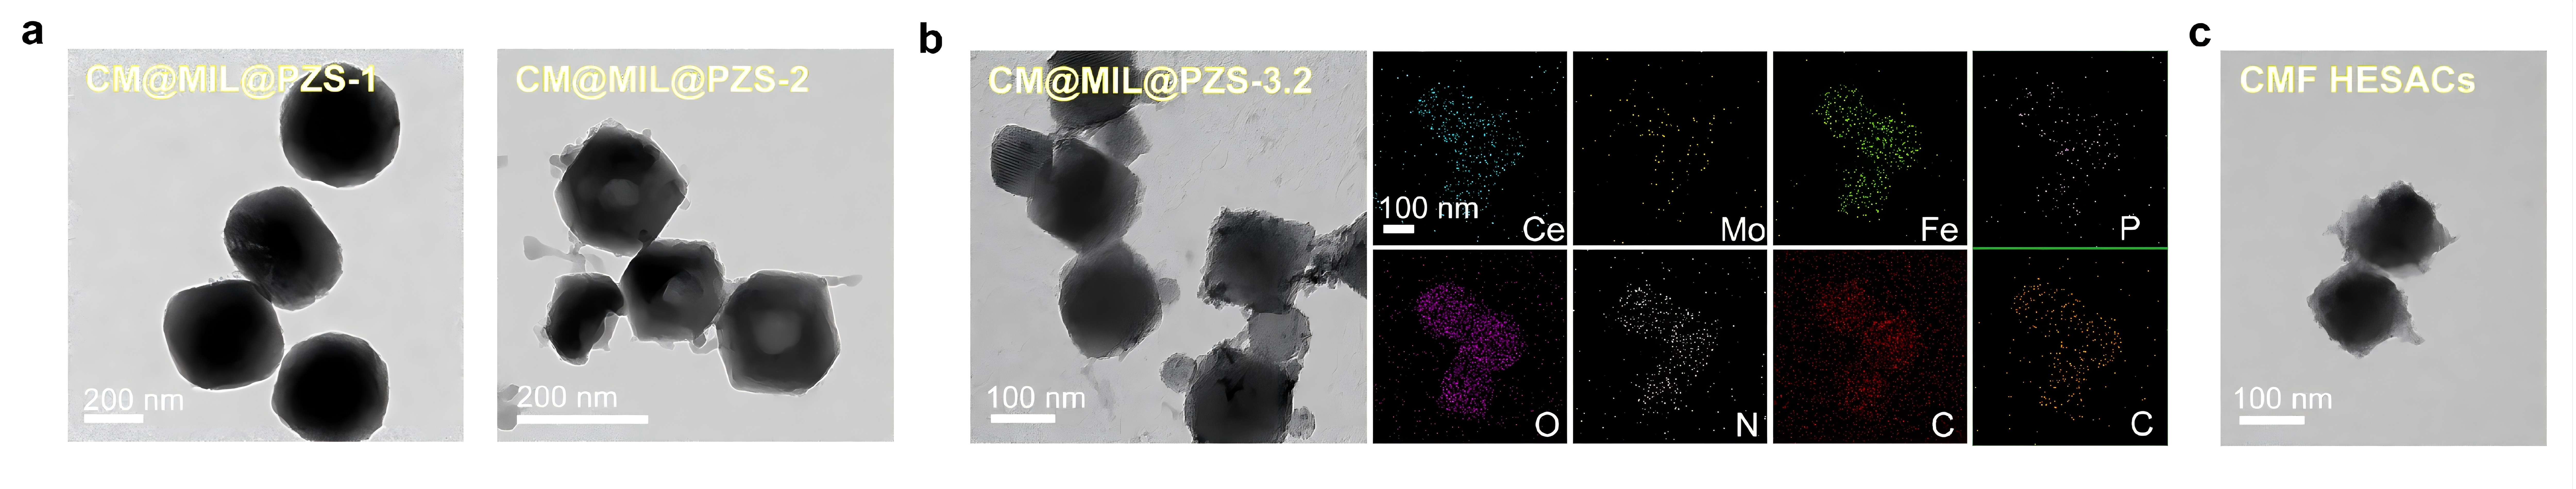


**Supplementary Fig. 3.** TEM images and mapping images of CM@MIL@PZS-3.2 catalysts.


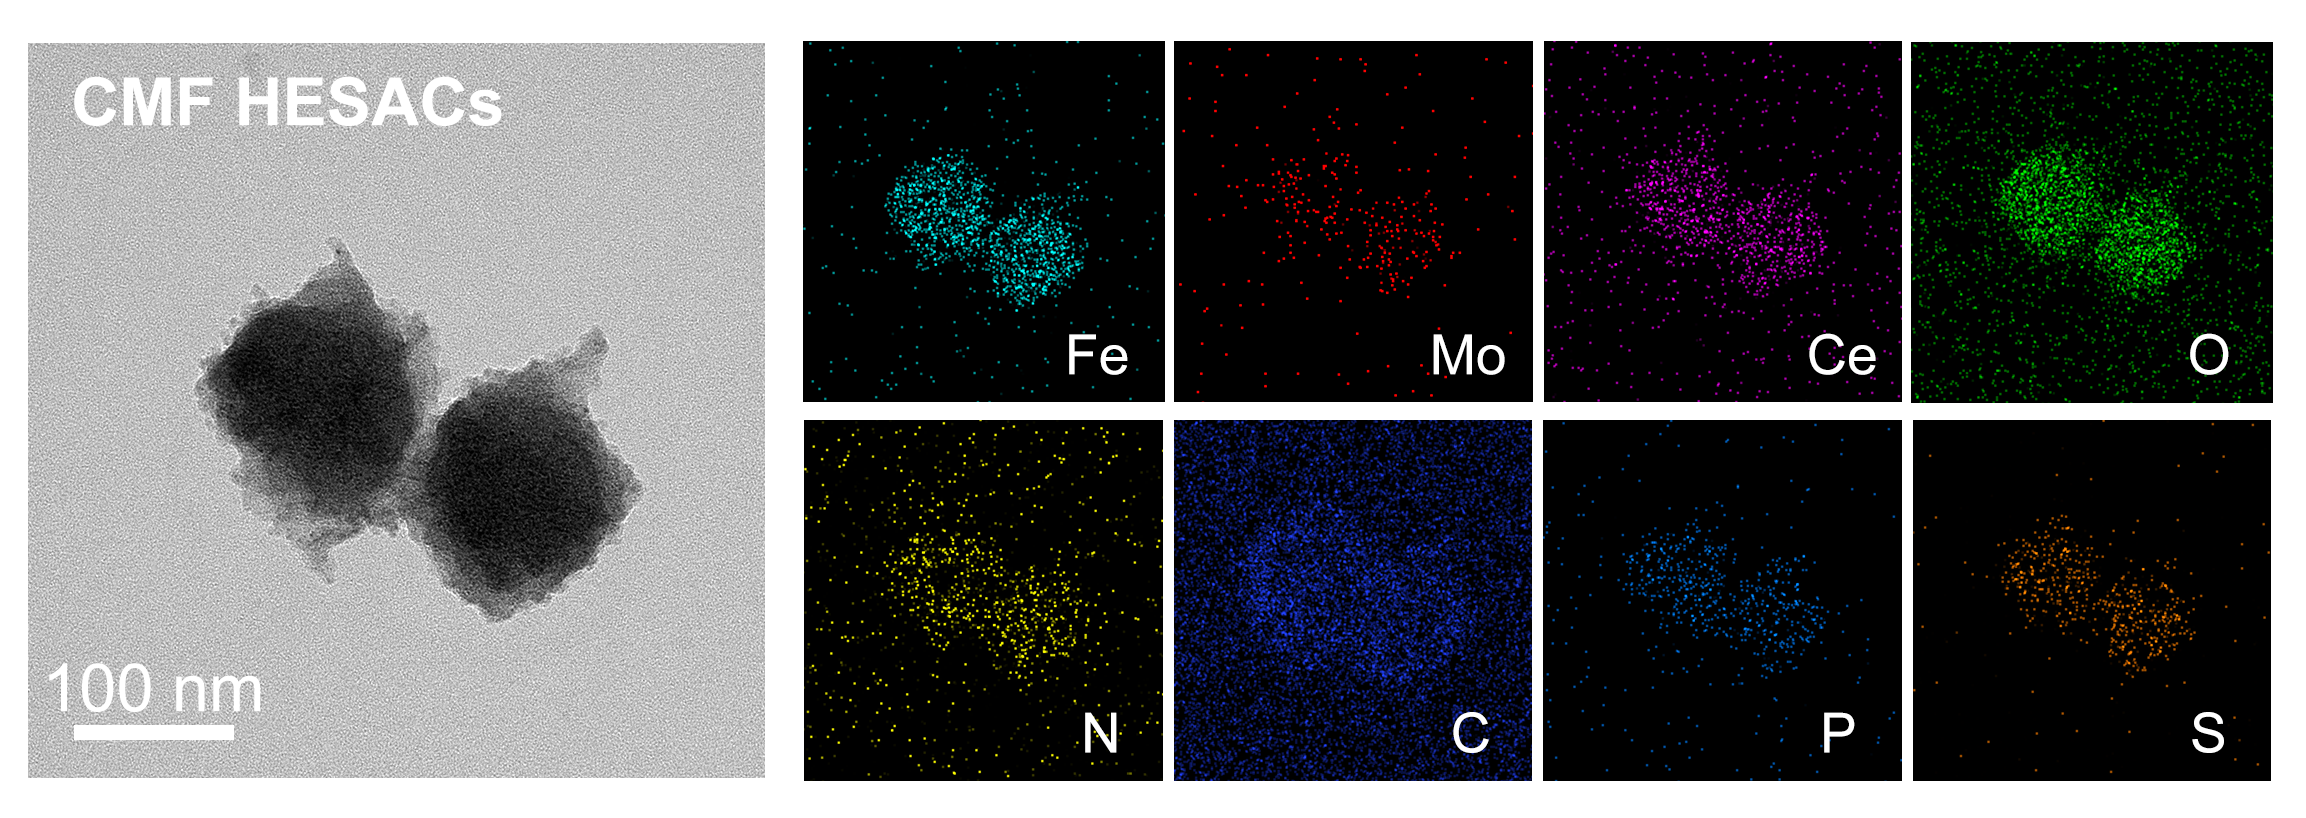


**Supplementary Fig. 4.** TEM images and elemental mapping profiles of CMF HESACs catalysts.


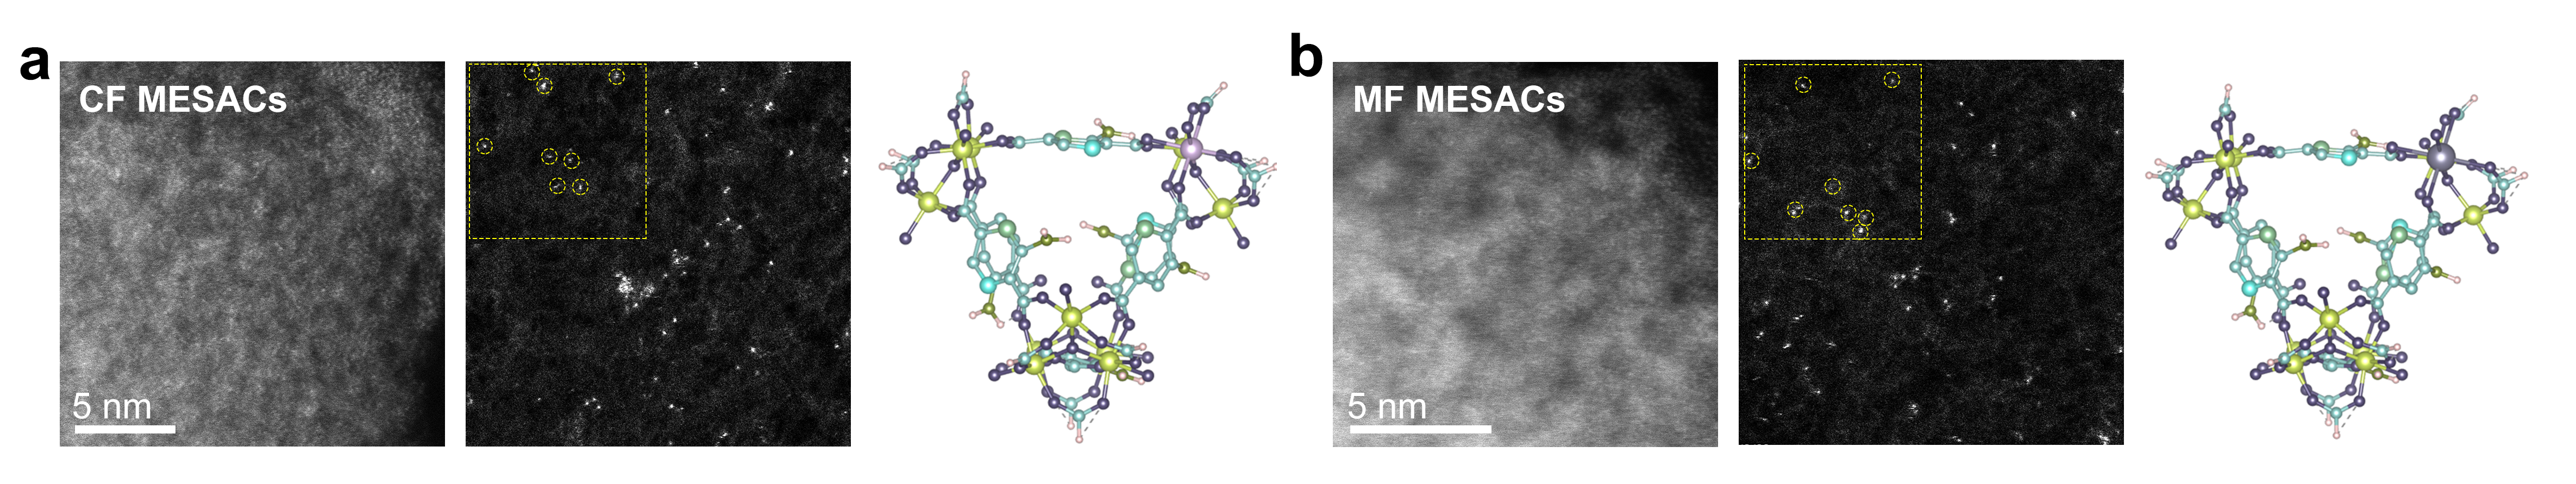


**Supplementary Fig. 5.** (a-b) AC-HAADF-STEM images and DFT modeling of CF MESACs and MF MESACs catalysts.


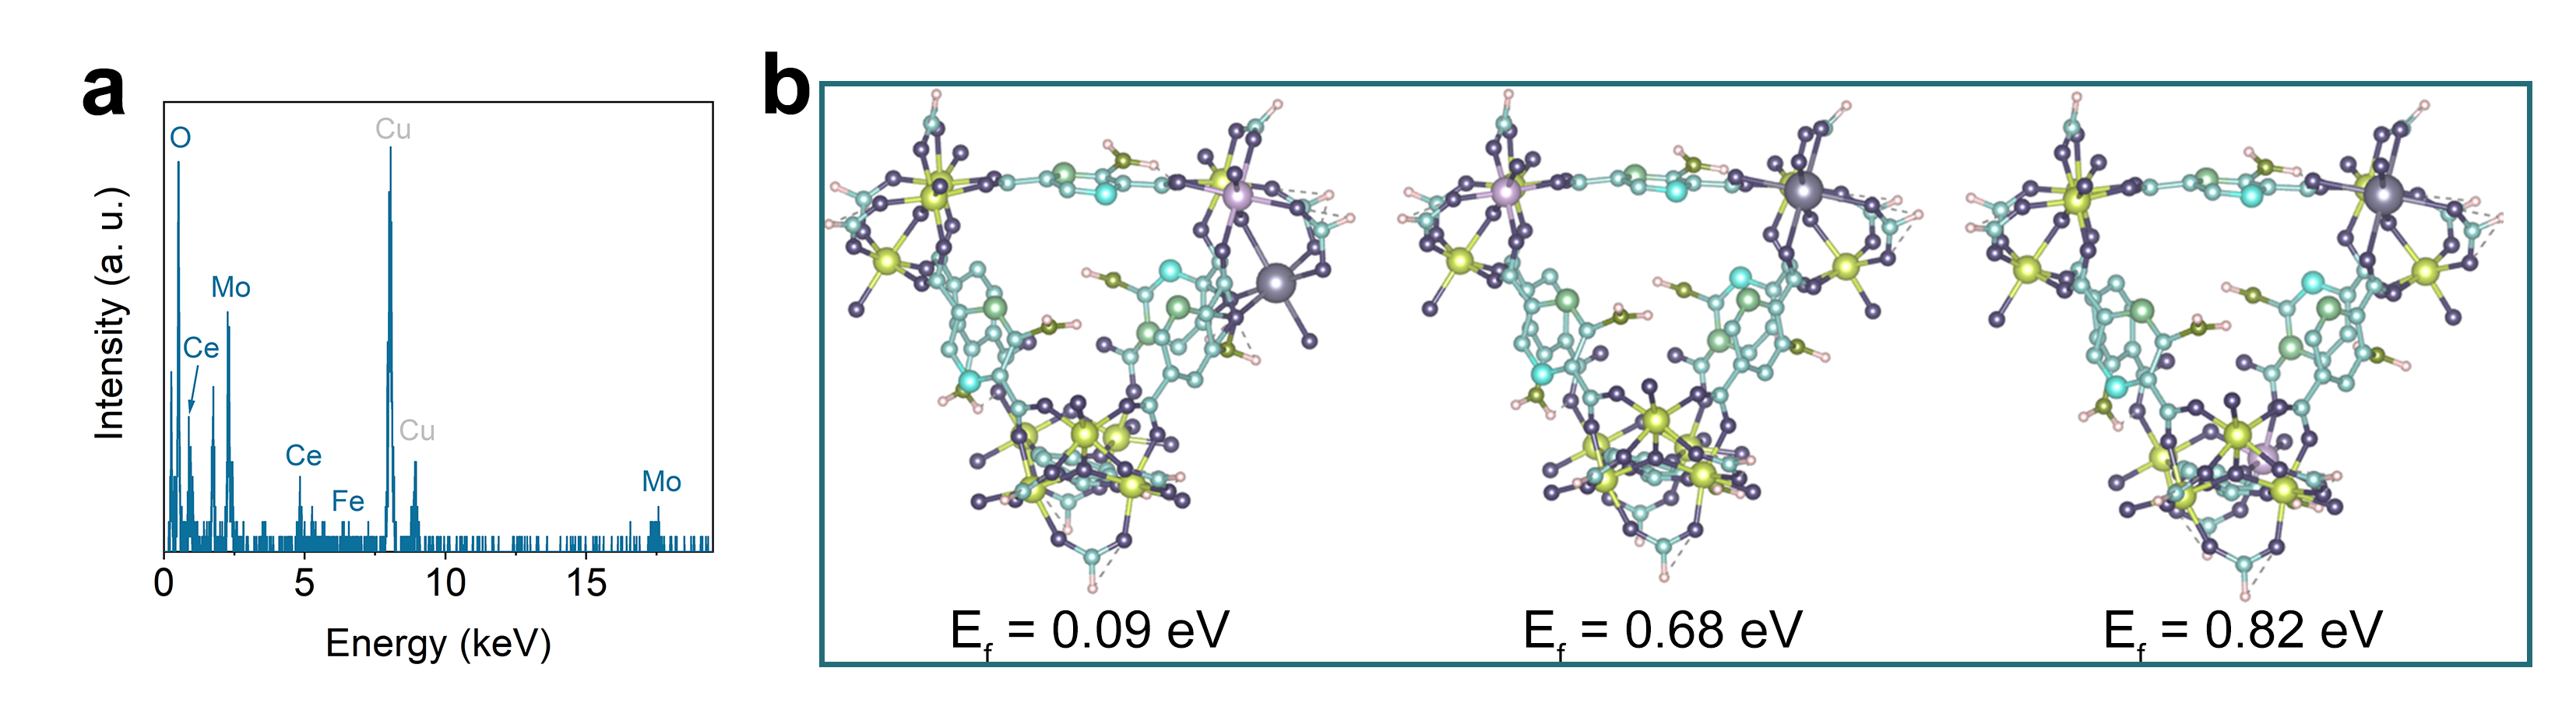


**Supplementary Fig. 6.** (a) EDS spectrum of CMF HESACs catalysts. (b) DFT modeling and formation energy calculations for CMF HESACs catalysts with distinct heterometallic coordination sites.

**
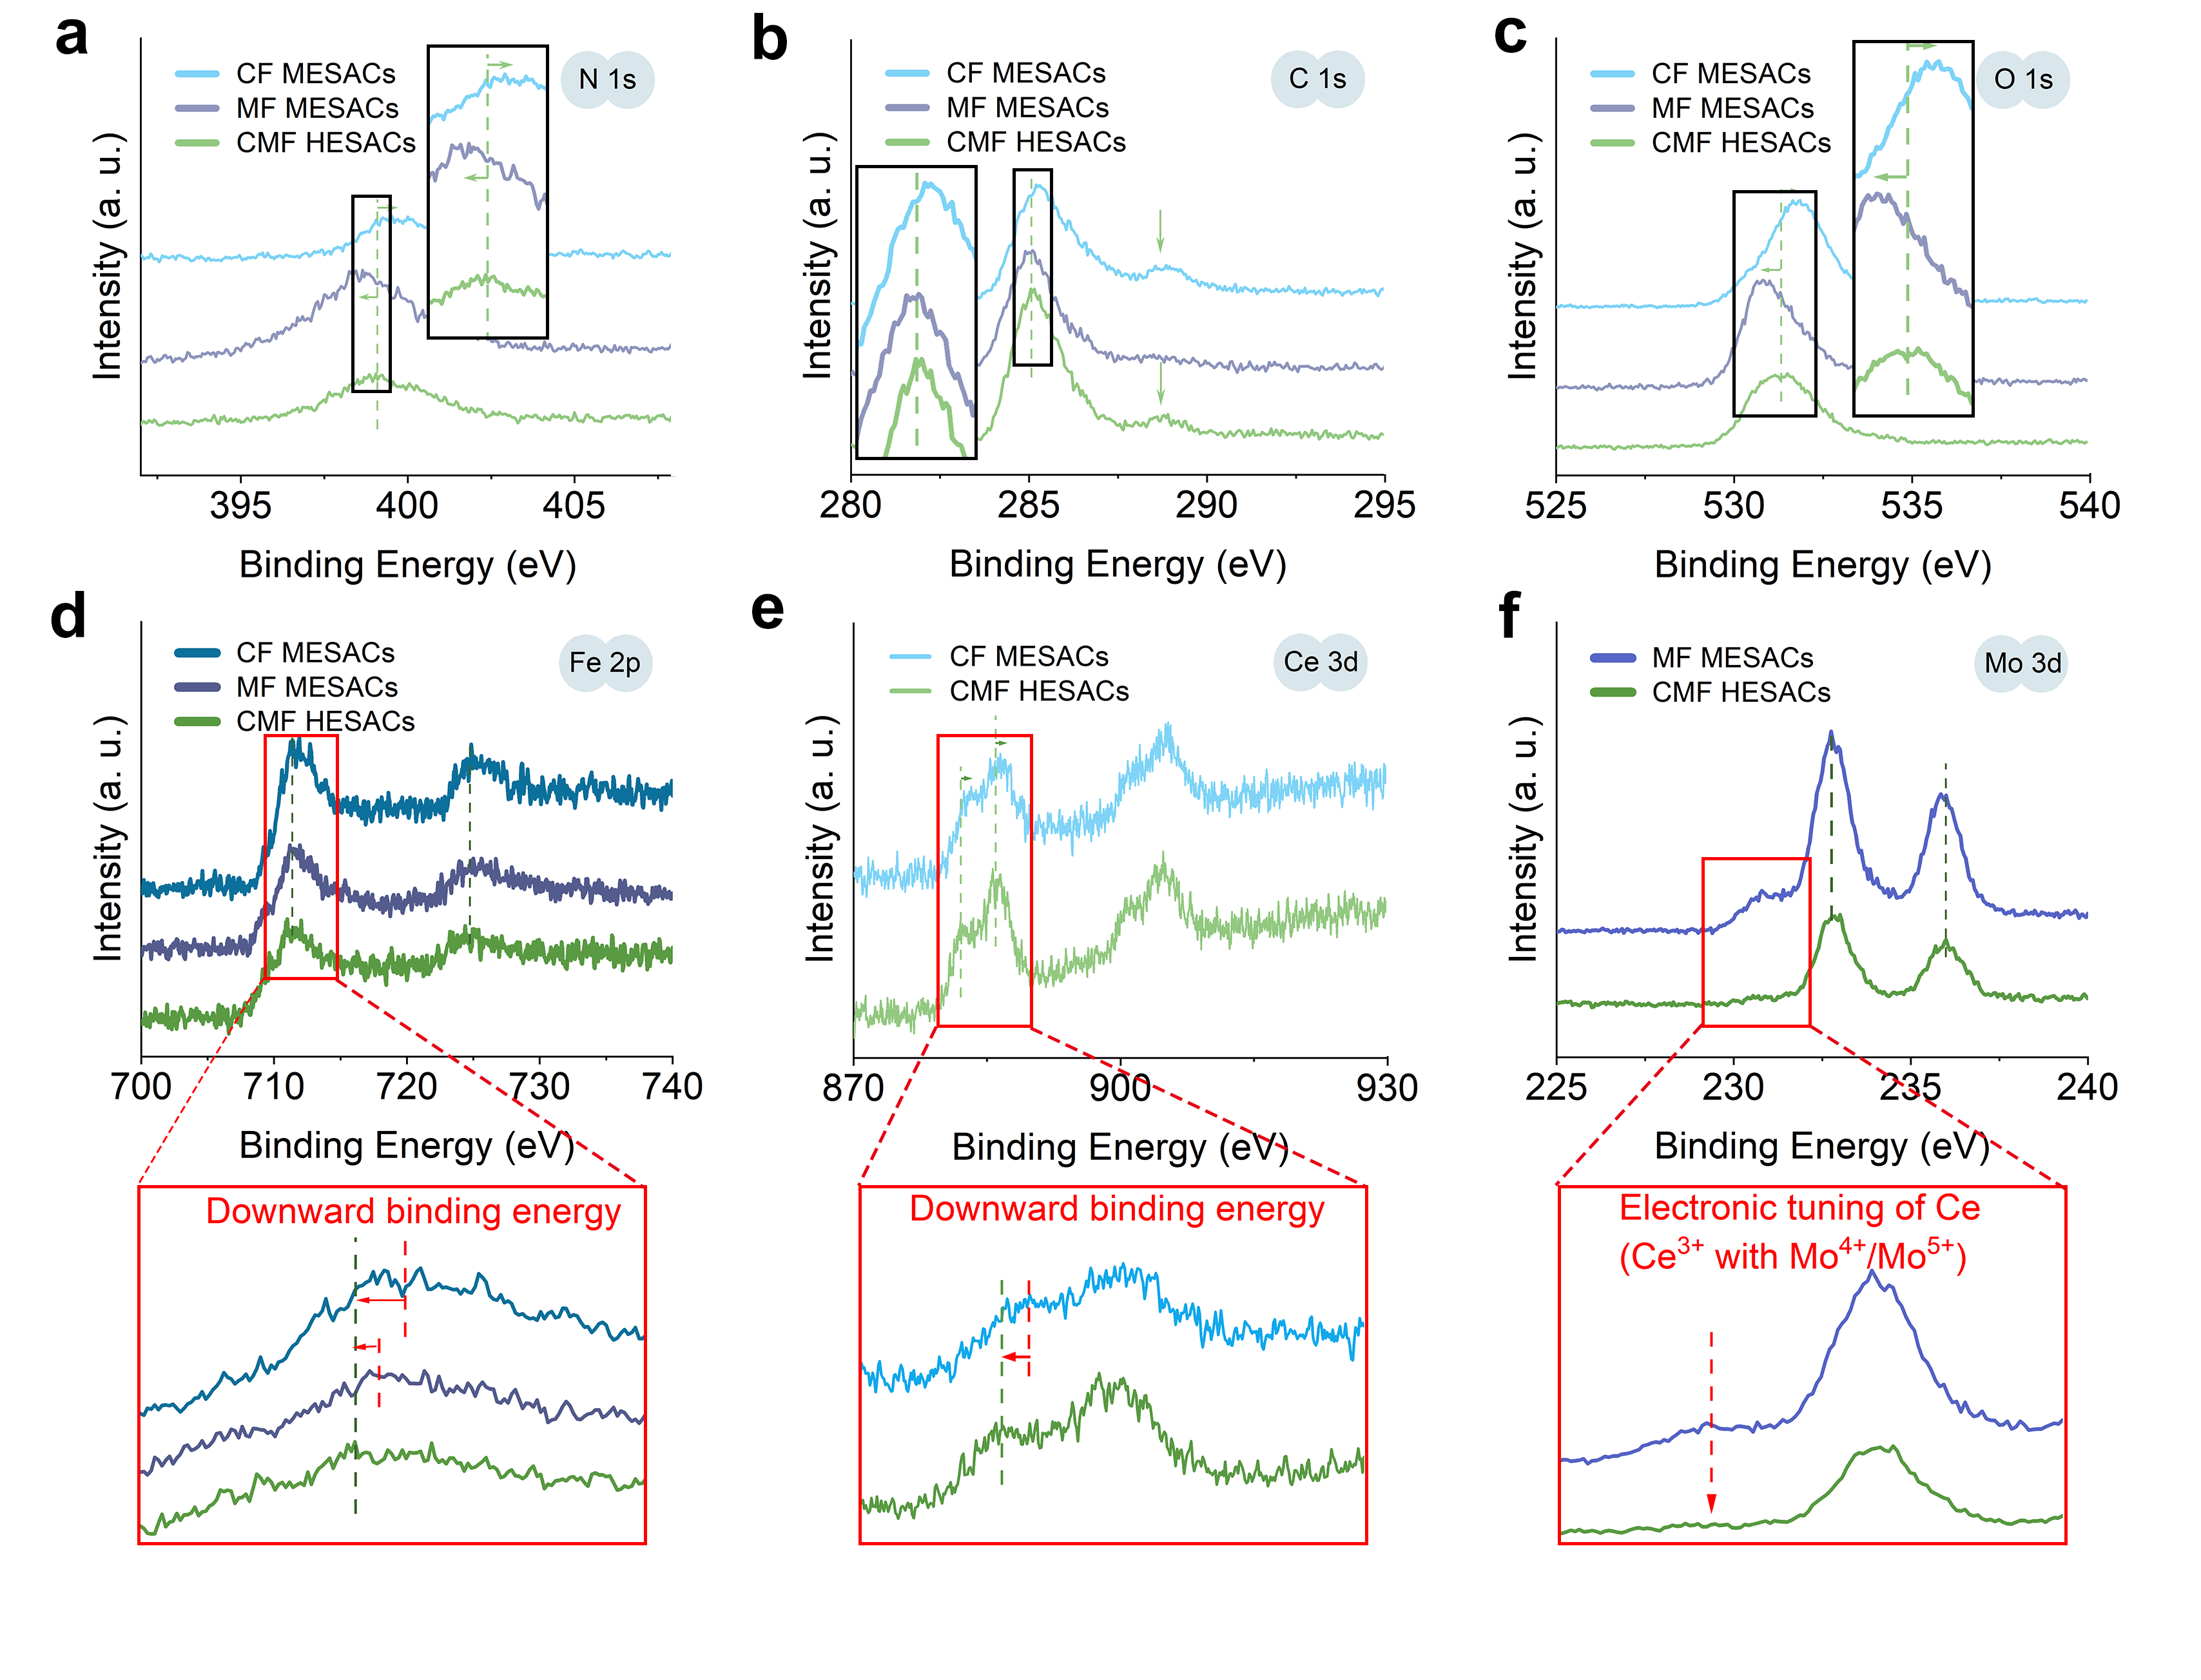
**

**Supplementary Fig. 7.** (a-f) XPS spectra of N, C, O, Fe, Ce, and Mo elements of CF MESACs, MF MESACs, and CMF HESACs catalysts.


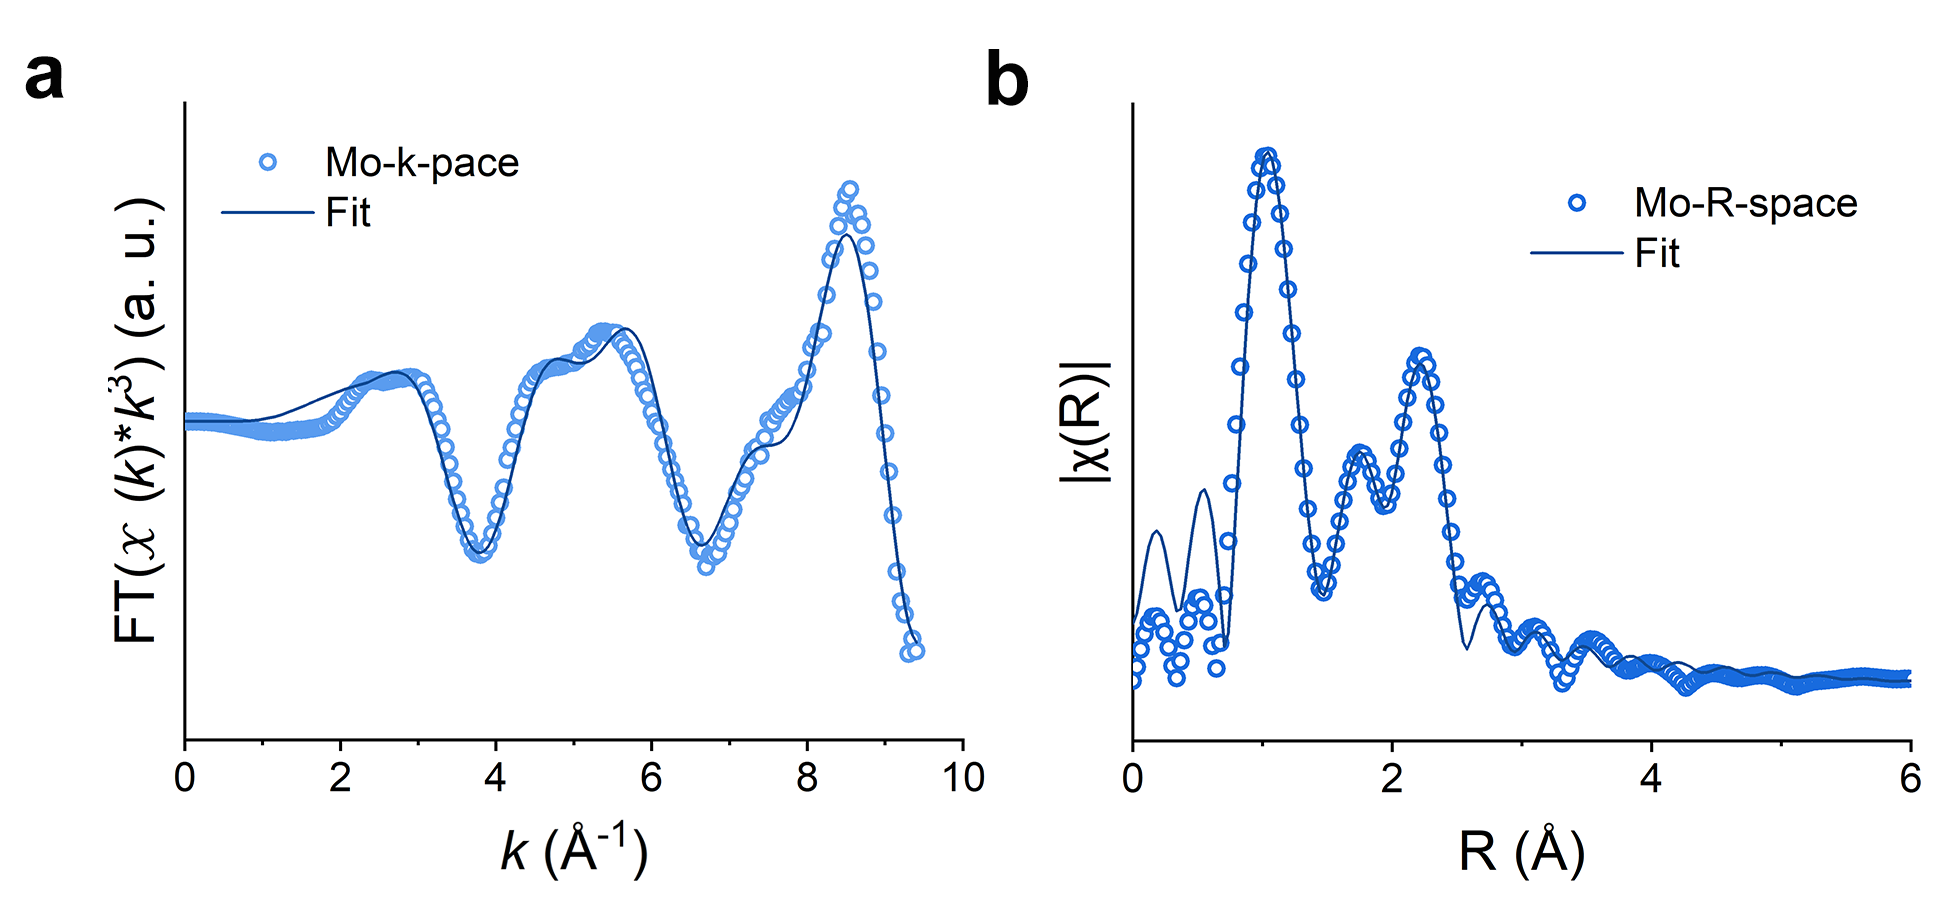


**Supplementary Fig. 8.** EXAFS spectra of Mo in CMF HESACs.


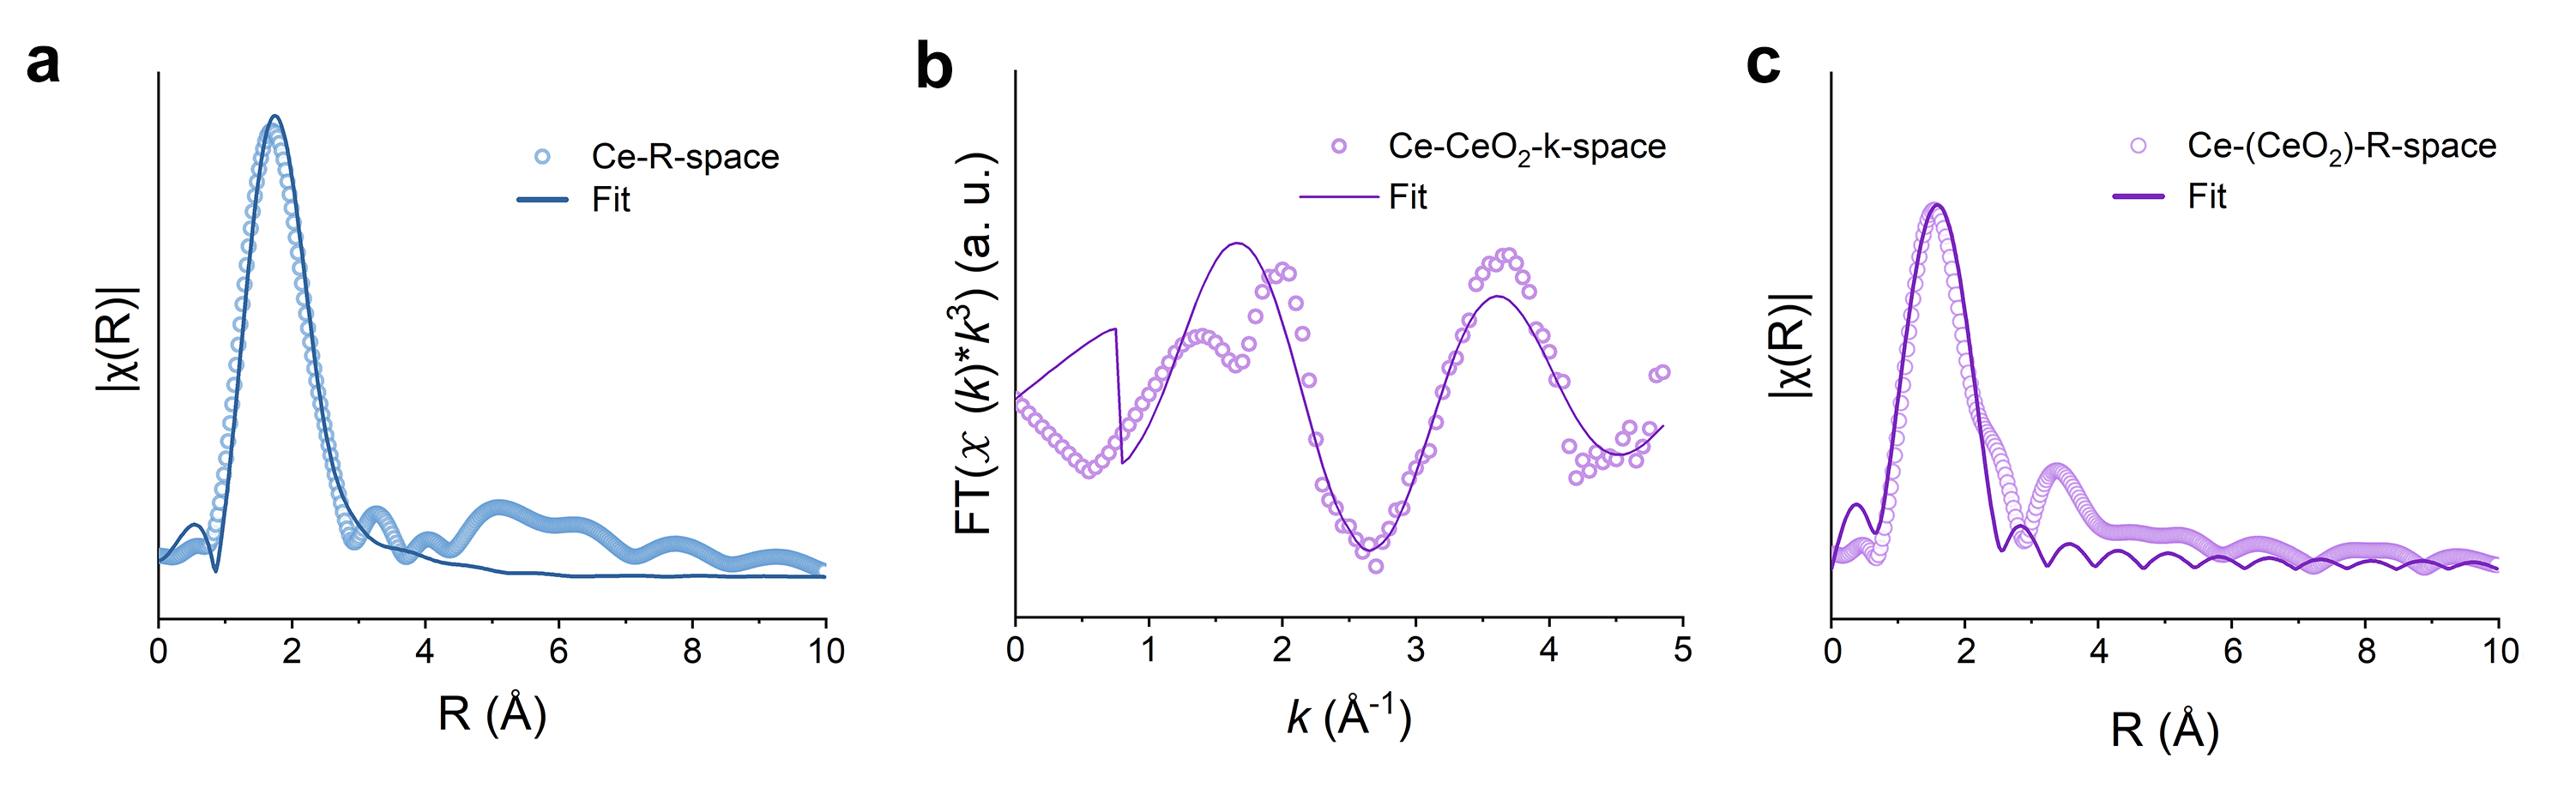


**Supplementary Fig. 9.** XANE and EXAFS spectra of Ce in (a) CMF HESACs and (b,c) CeO2.
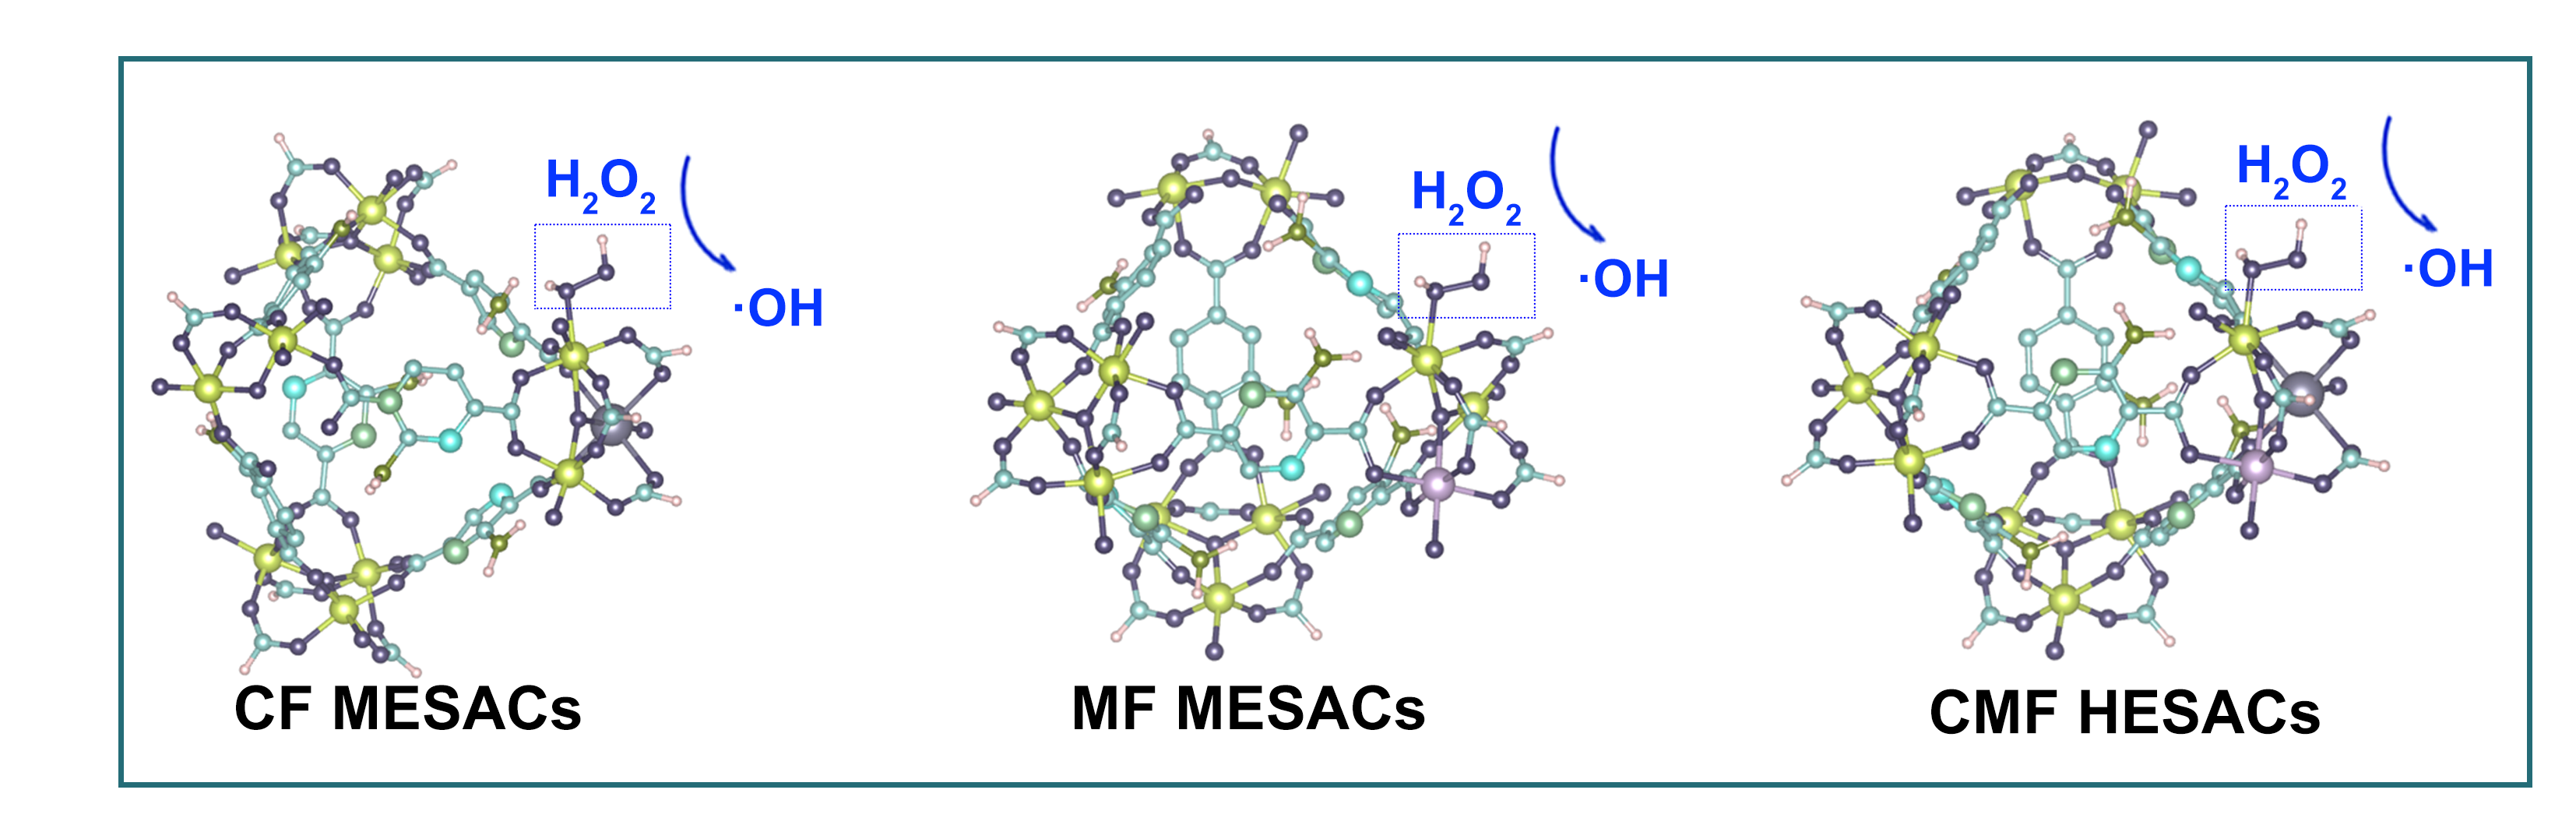


**Supplementary Fig. 10.** schematic representation of H2O2 adsorption configurations.


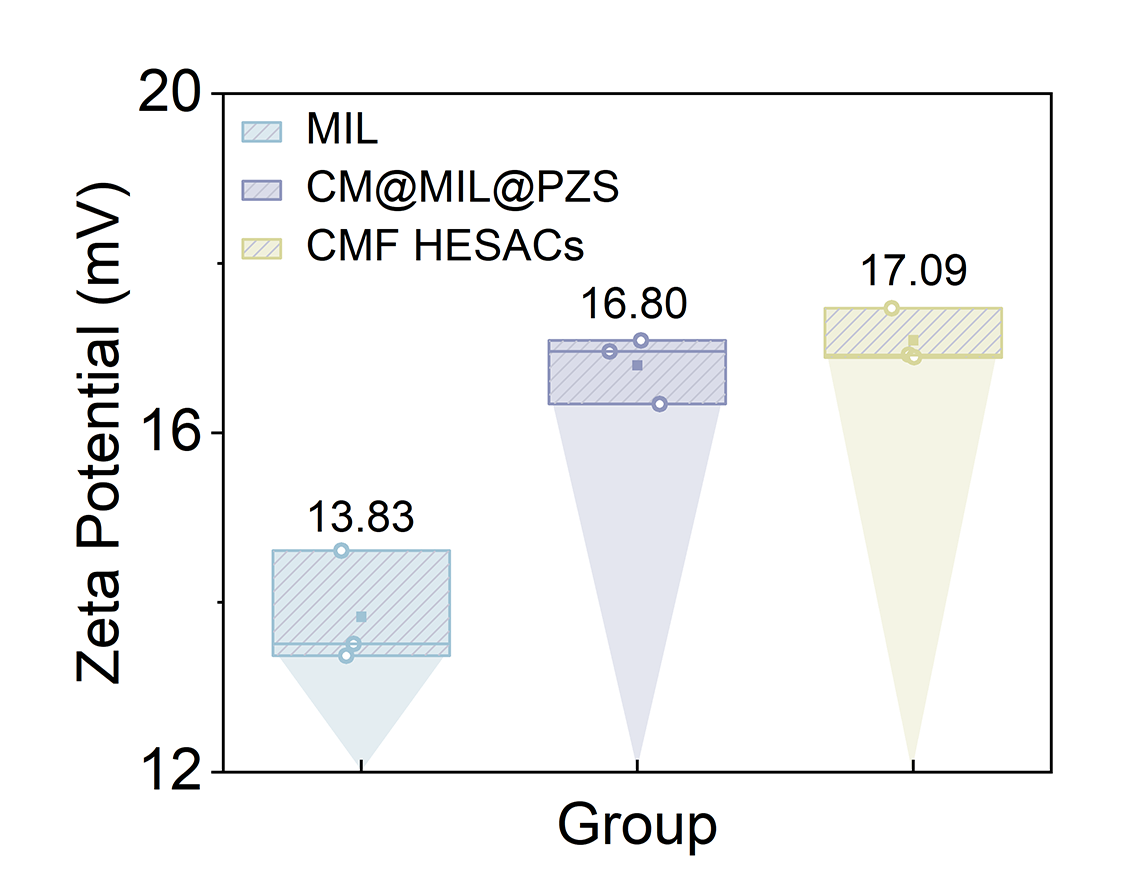


**Supplementary Fig. 11.** Zeta potential measurements of MIL, CM@MIL@PZS, and CMF HESACs catalysts.


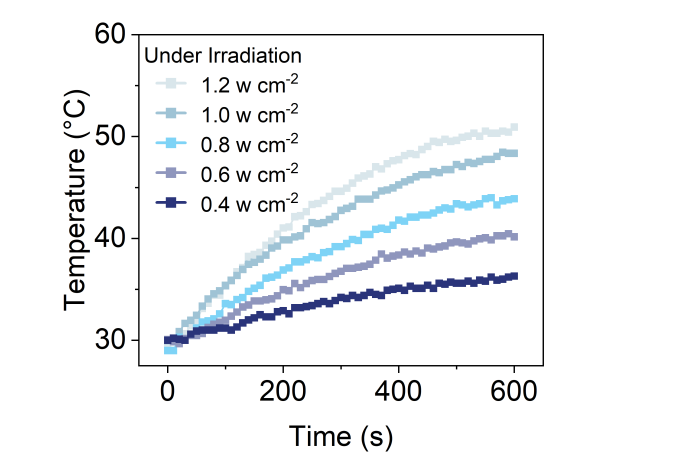


**Supplementary Fig. 12.** The power density temperature-rising behaviors of CMF HESACs catalysts after irradiation for 10 min.

**
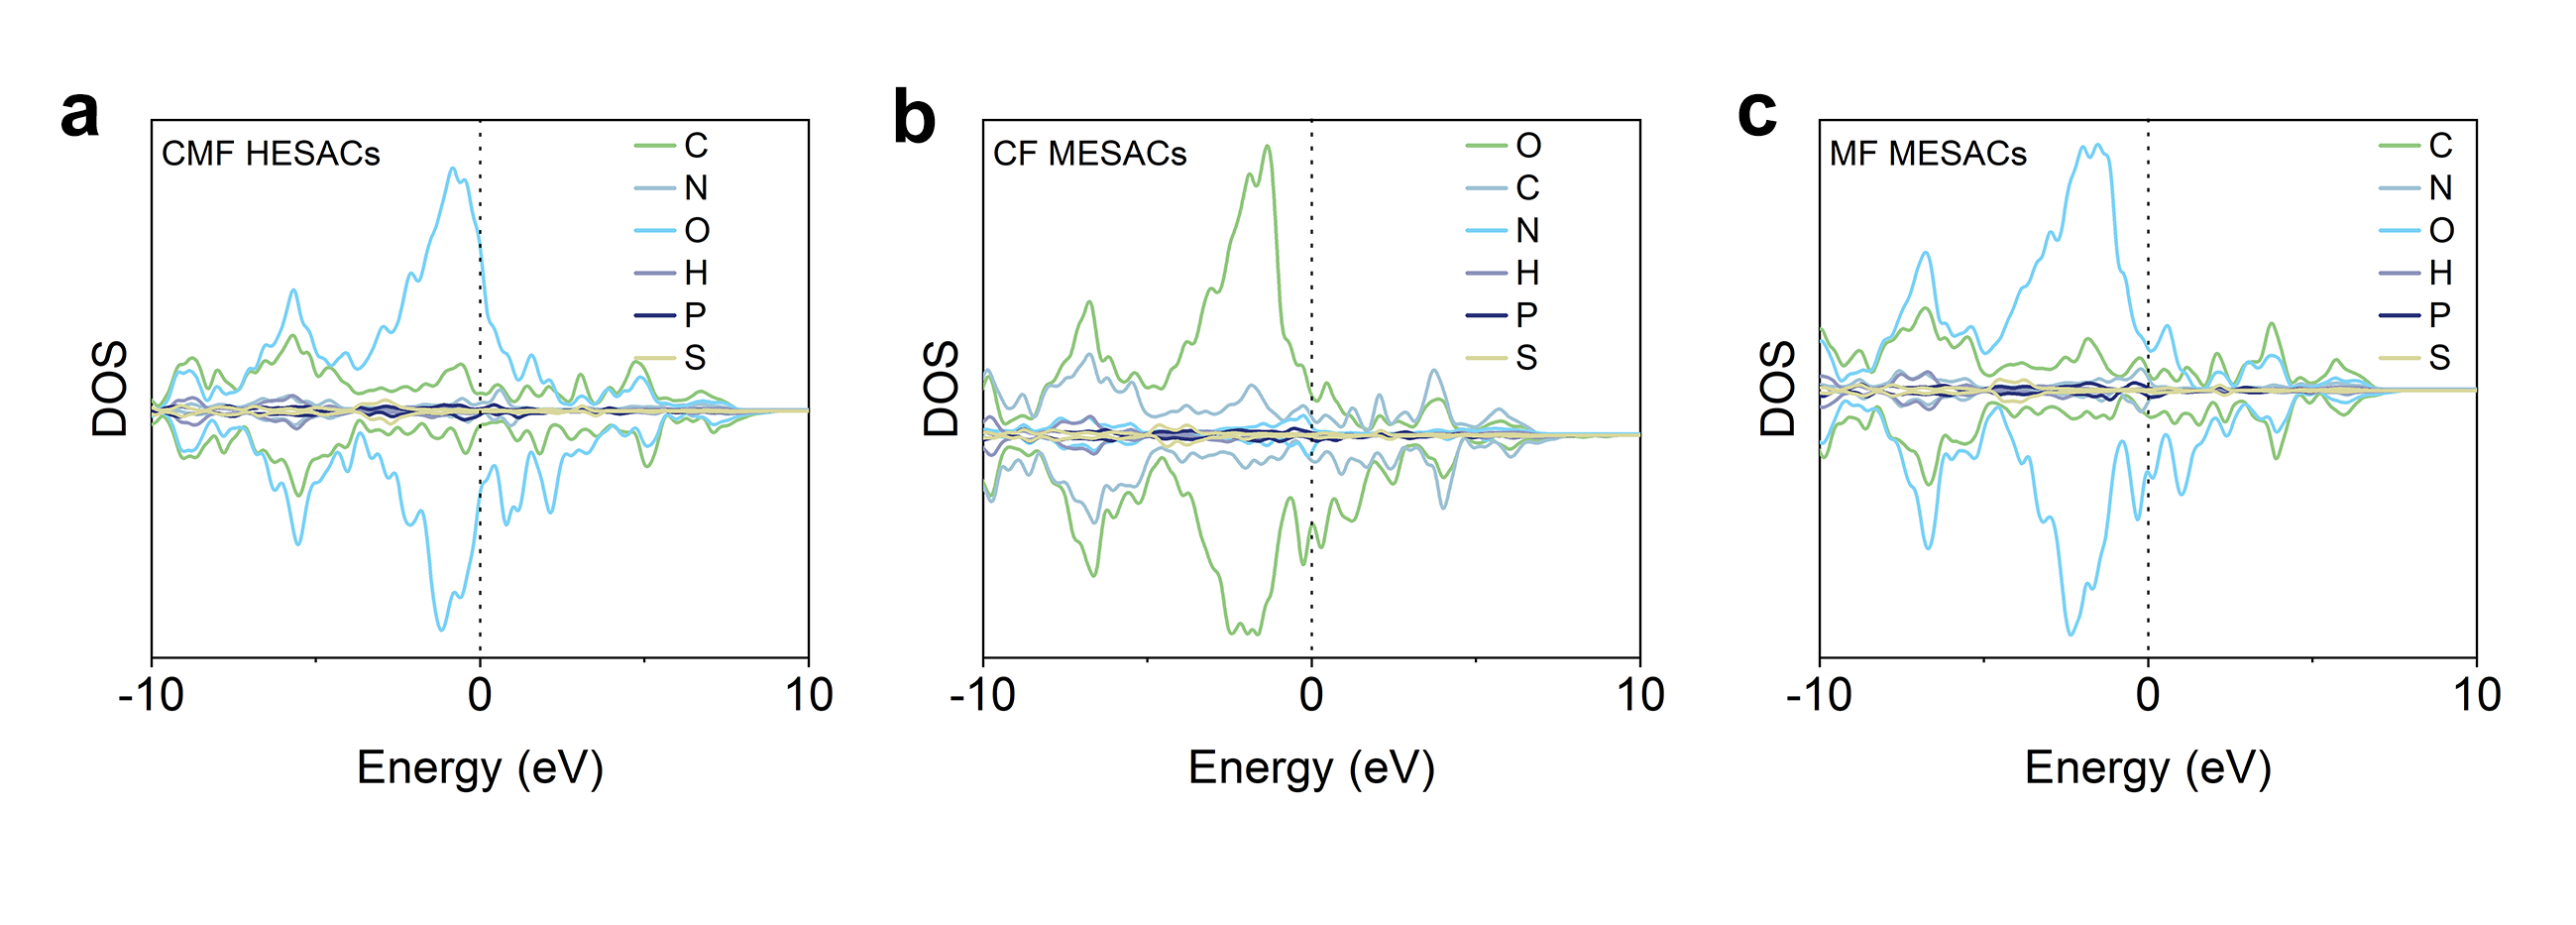
**

**Supplementary Fig. 13.** The PDOSs results of the C/N/P/S atoms.


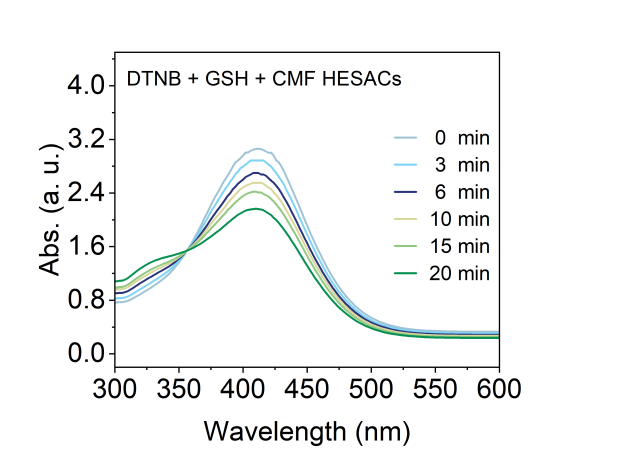


**Supplementary Fig. 14.** The GSH depletion ability with time of CMF HESACs solutions revealed by UV-Vis.


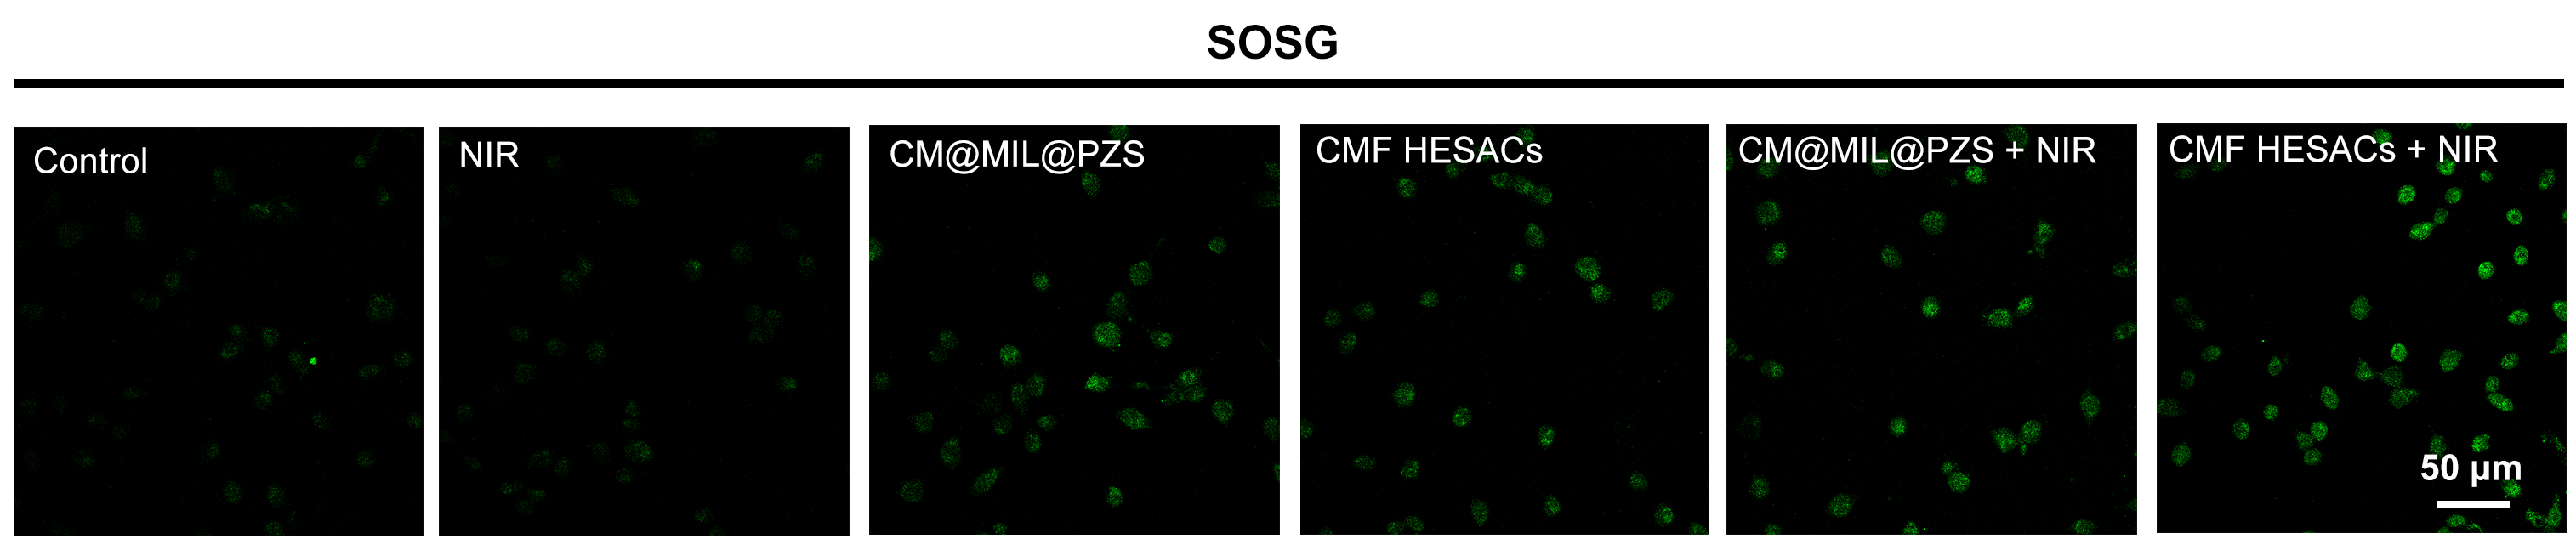


**Supplementary Fig. 15.** 1O2 generation measured using the SOSG assay kit.


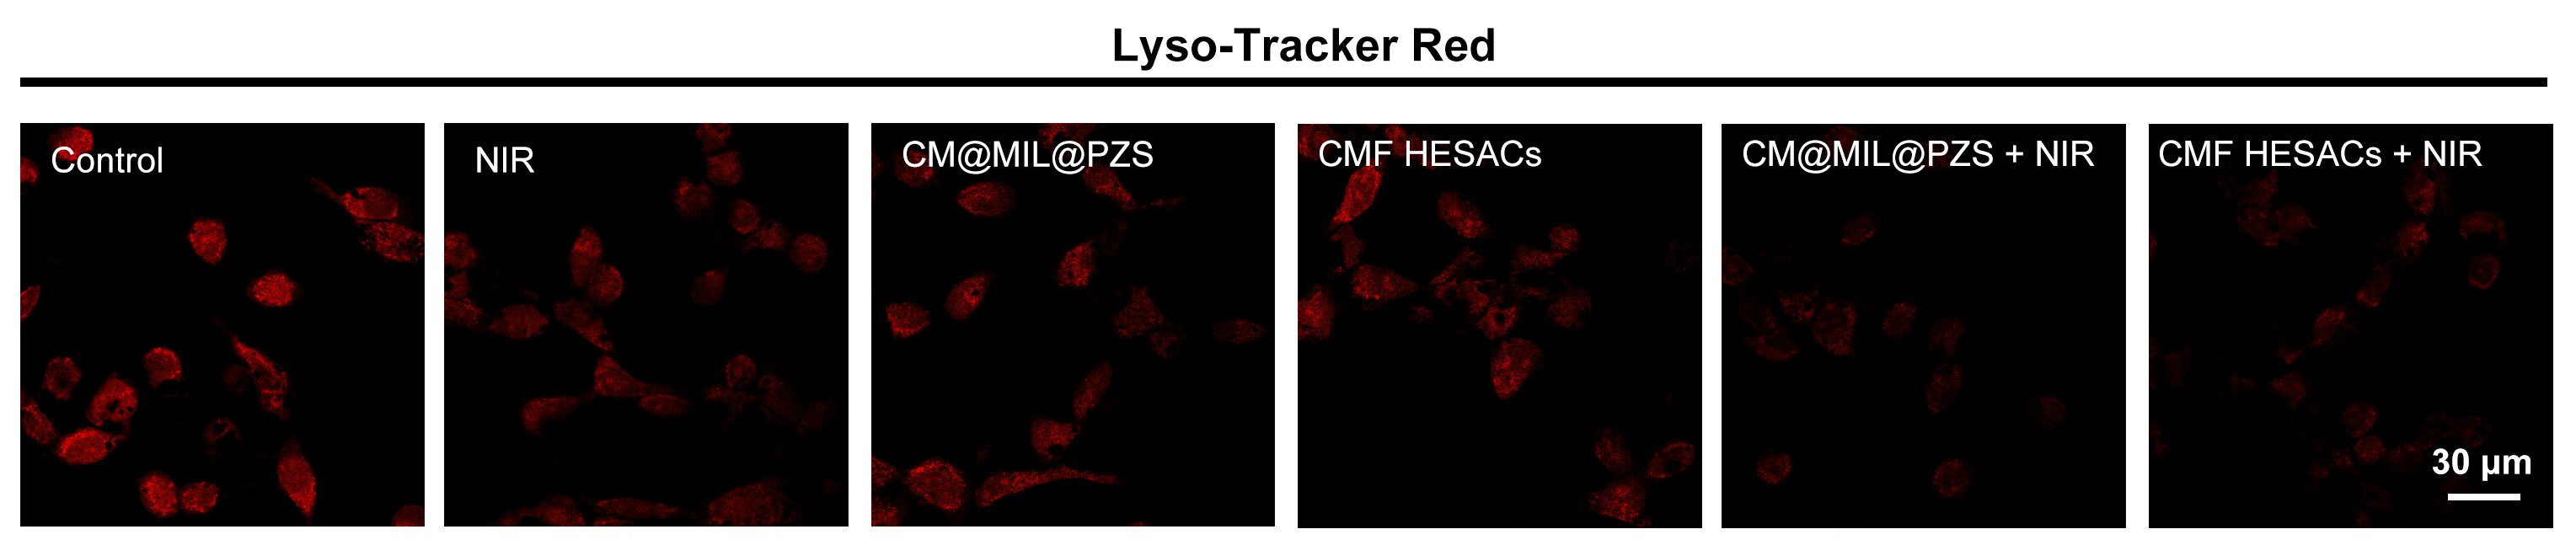


**Supplementary Fig. 16.** Lysosomal localization behavior observed *via* lyso-tracker probe.


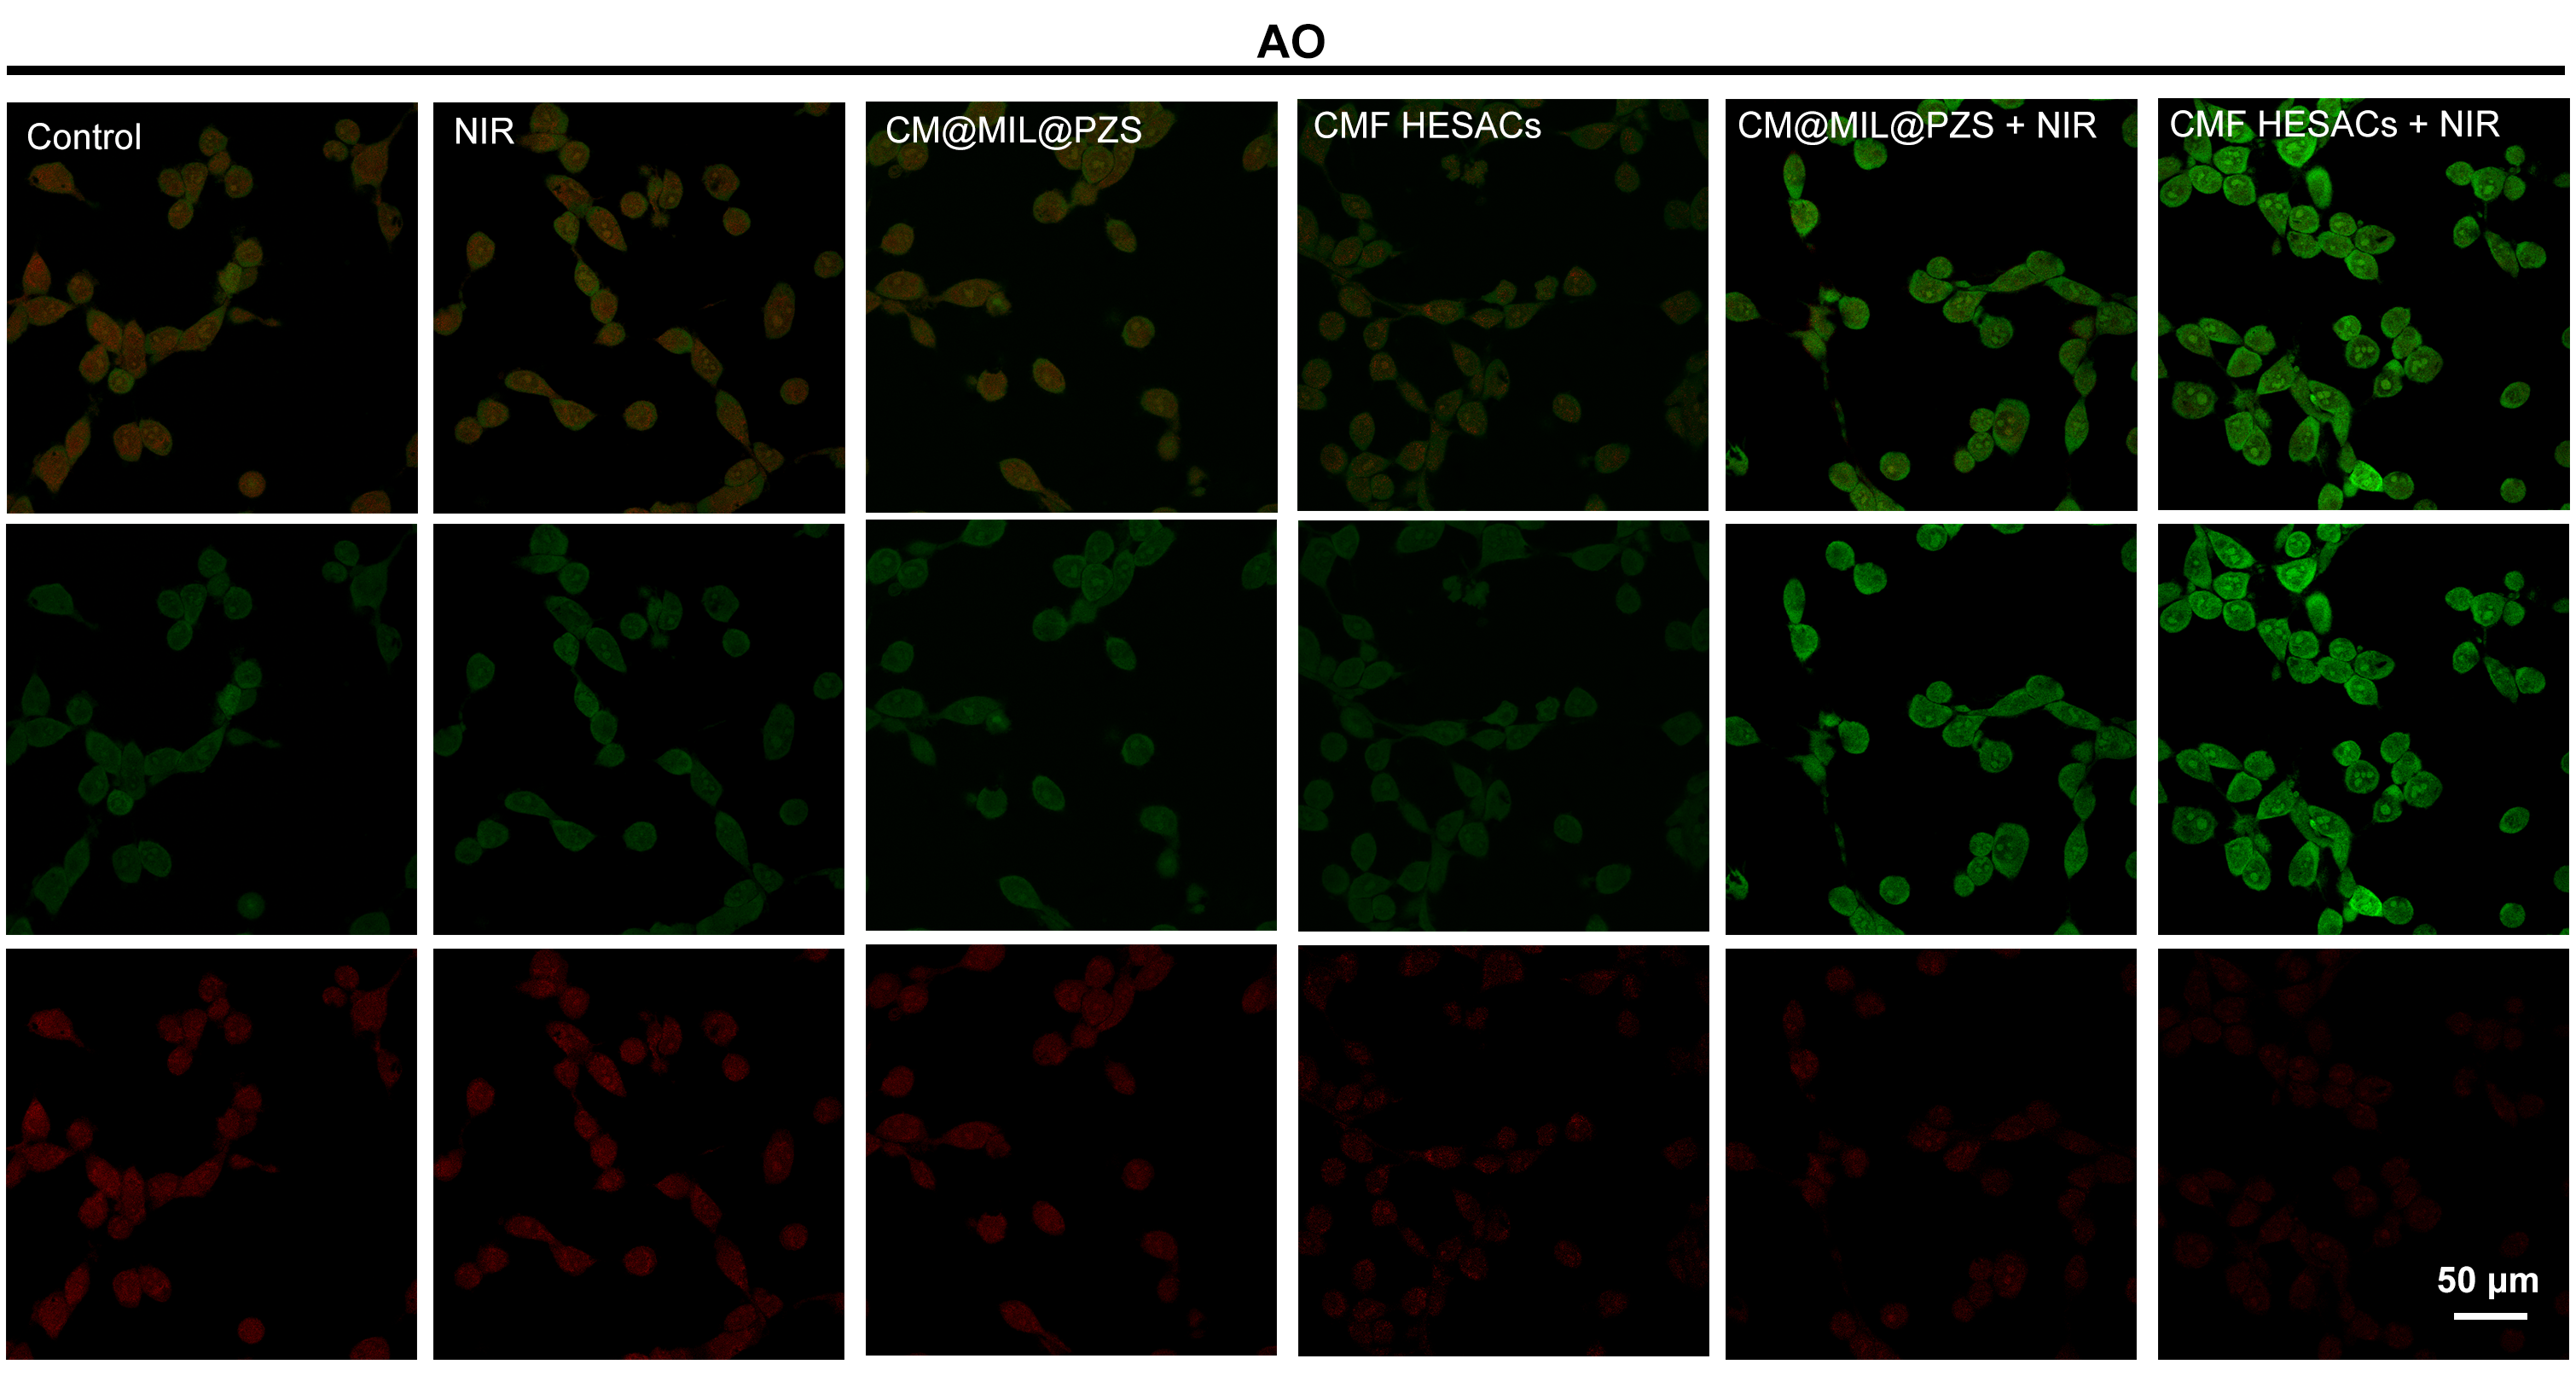


**Supplementary Fig. 17.** Lysosomal acidity evaluated using AO probes.


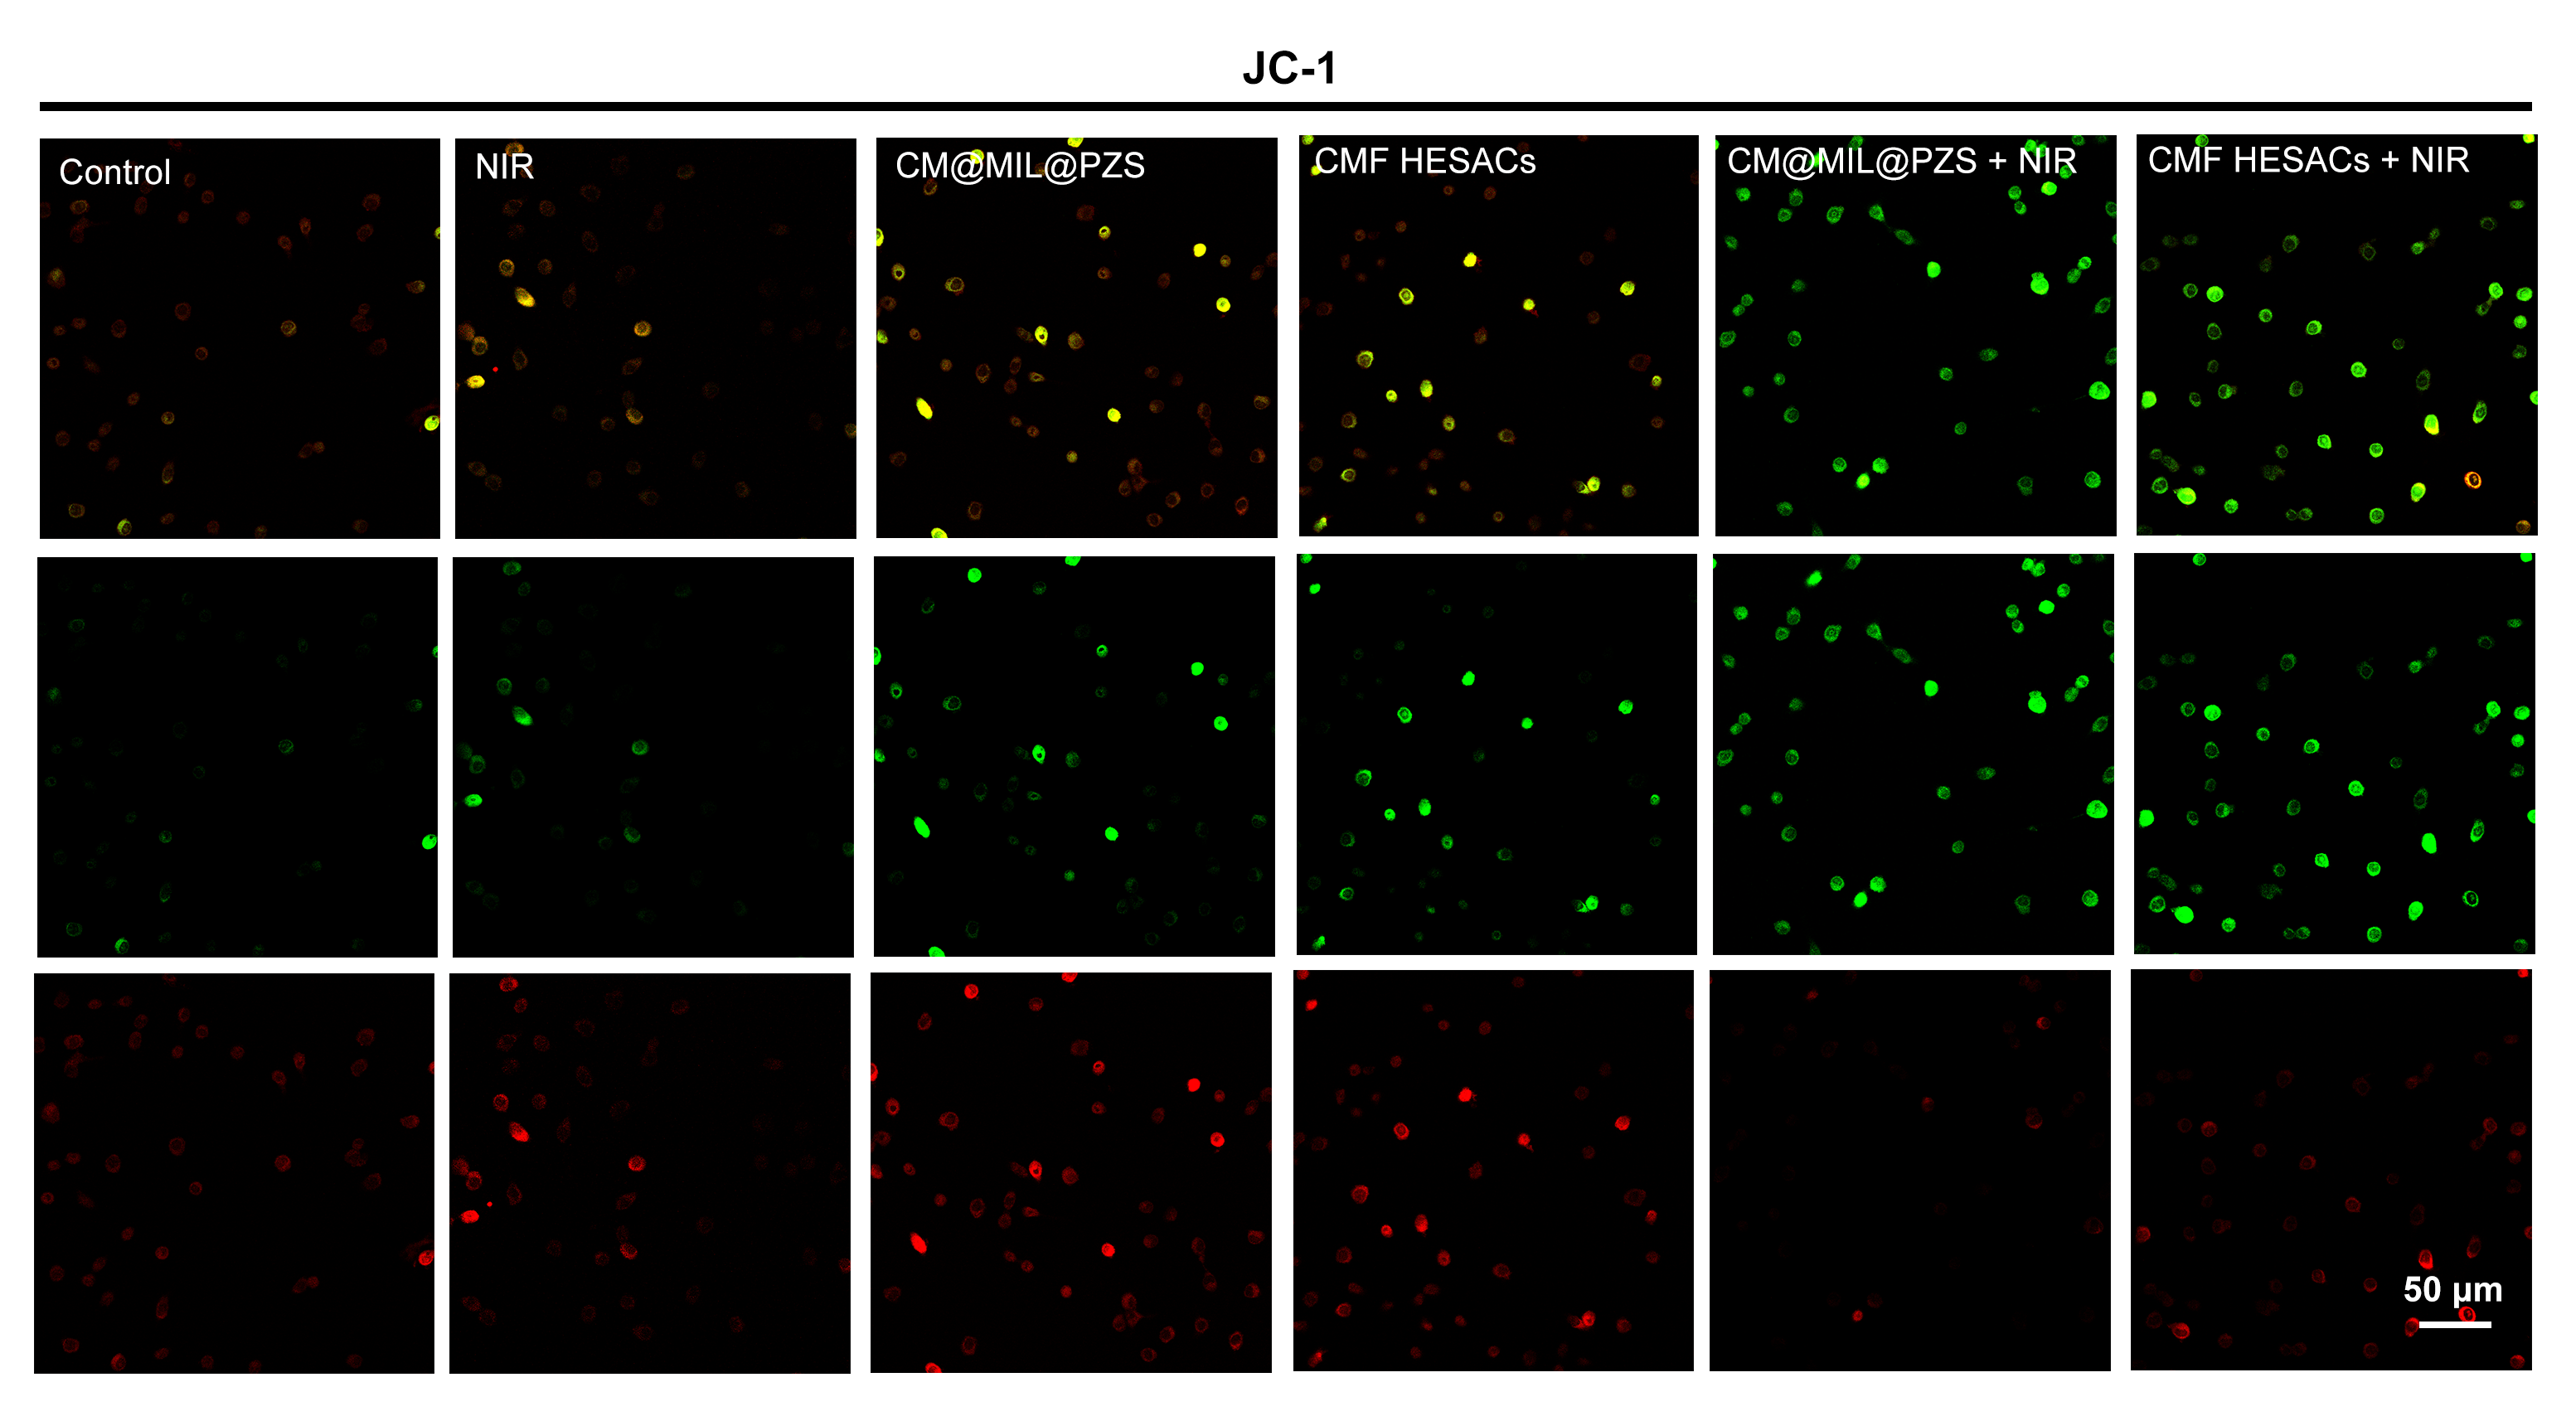


**Supplementary Fig. 18.** Mitochondrial membrane potential dynamics evaluated using JC-1 probes.


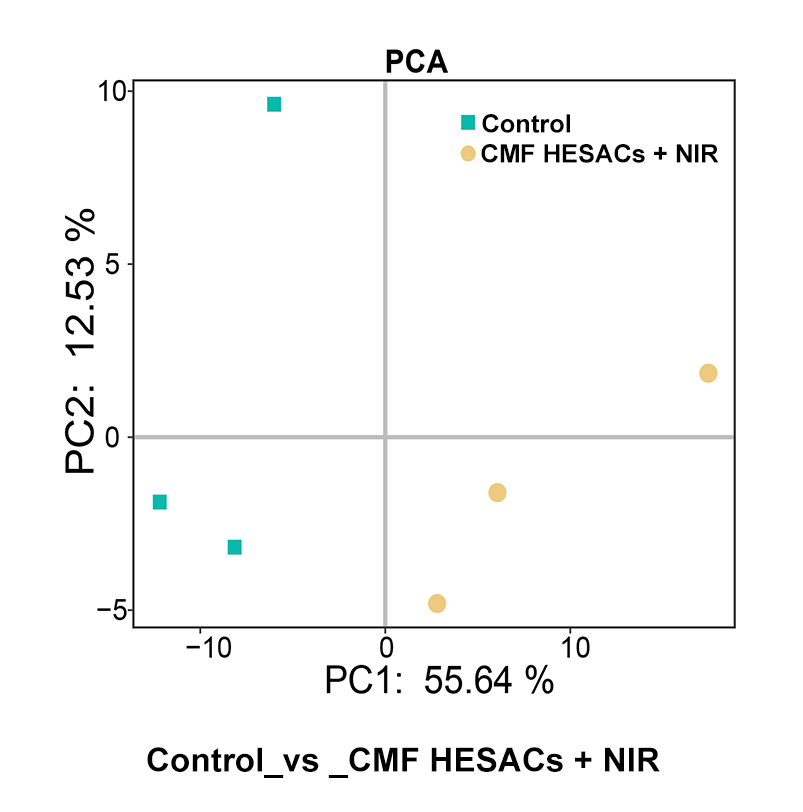


**Supplementary Fig. 19.** PCA analysis of samples in control and CMF HESACs + NIR groups.


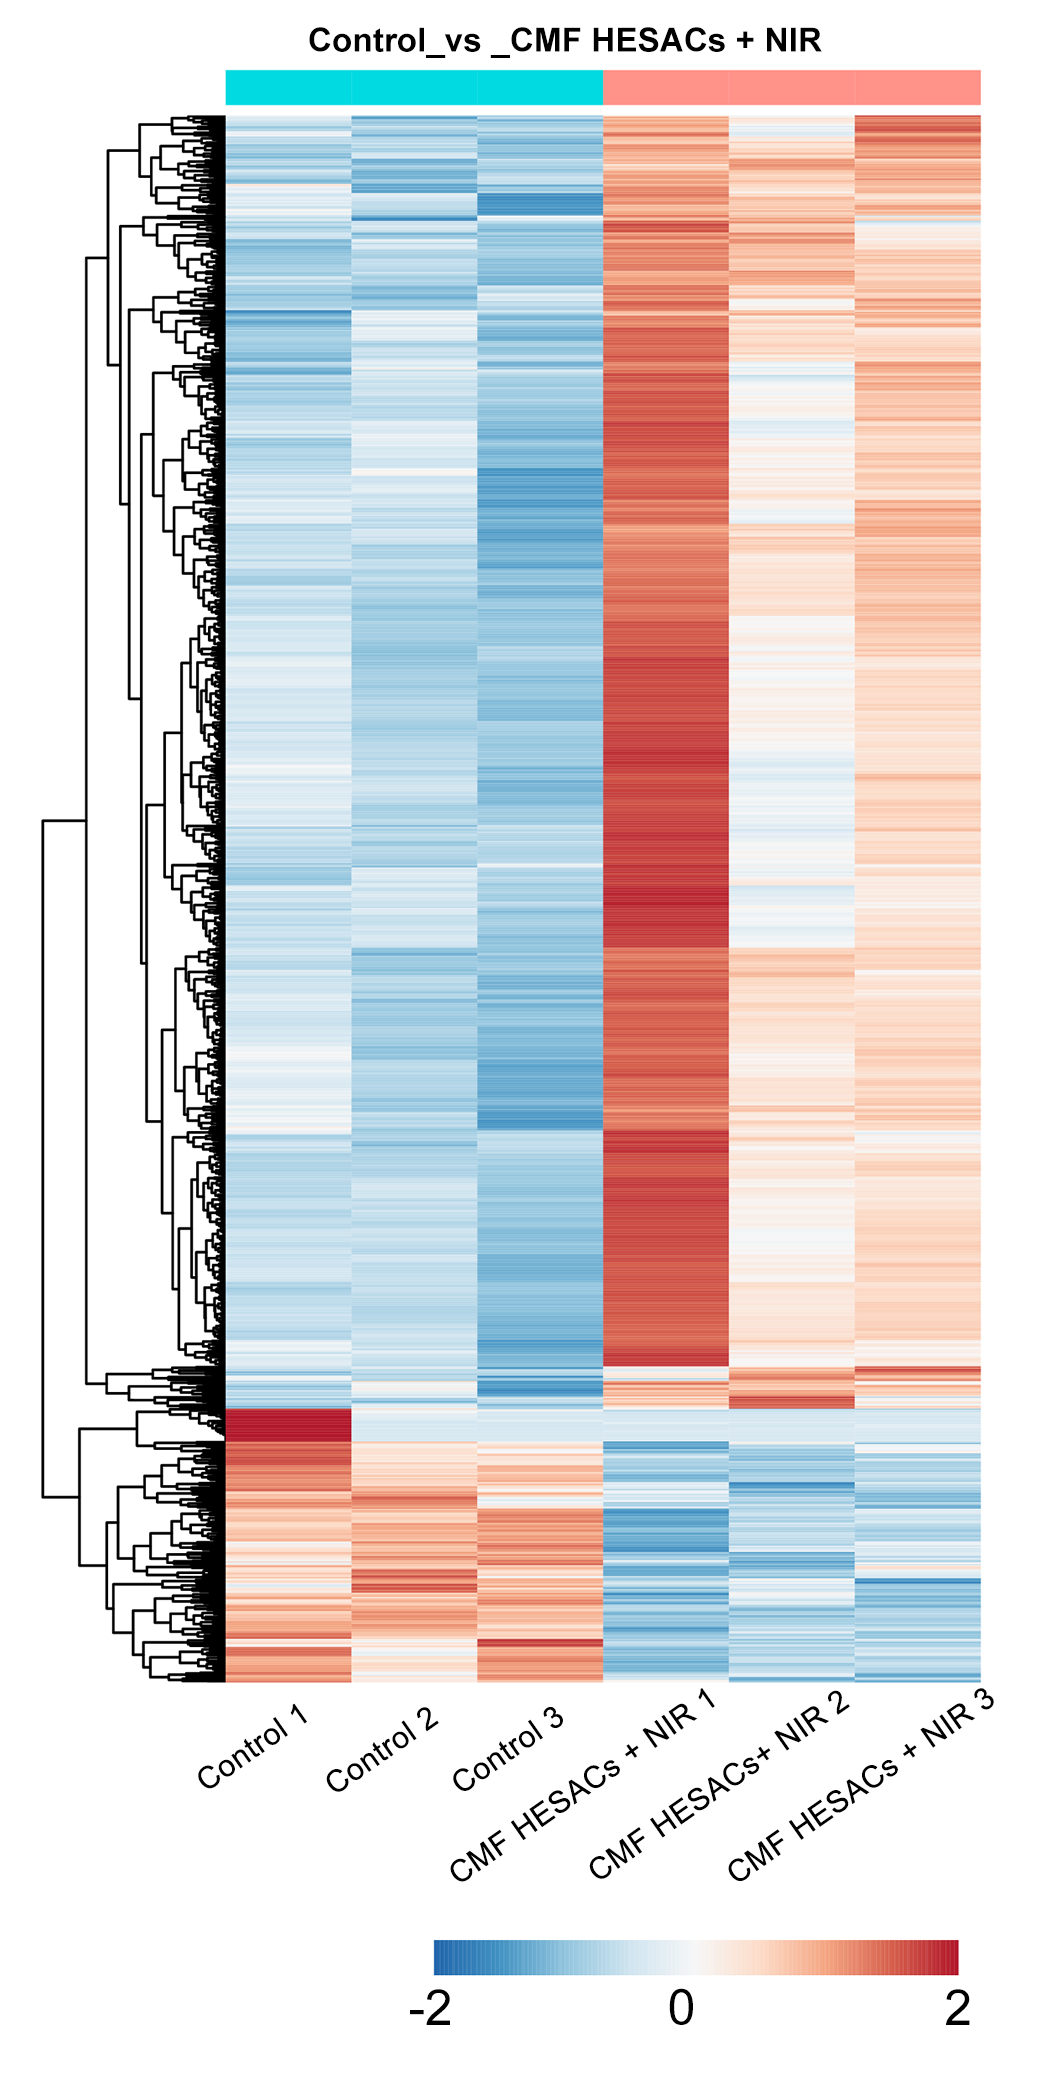


**Supplementary Fig. 20.** Clustering heatmap of DEGs in different treatment groups.


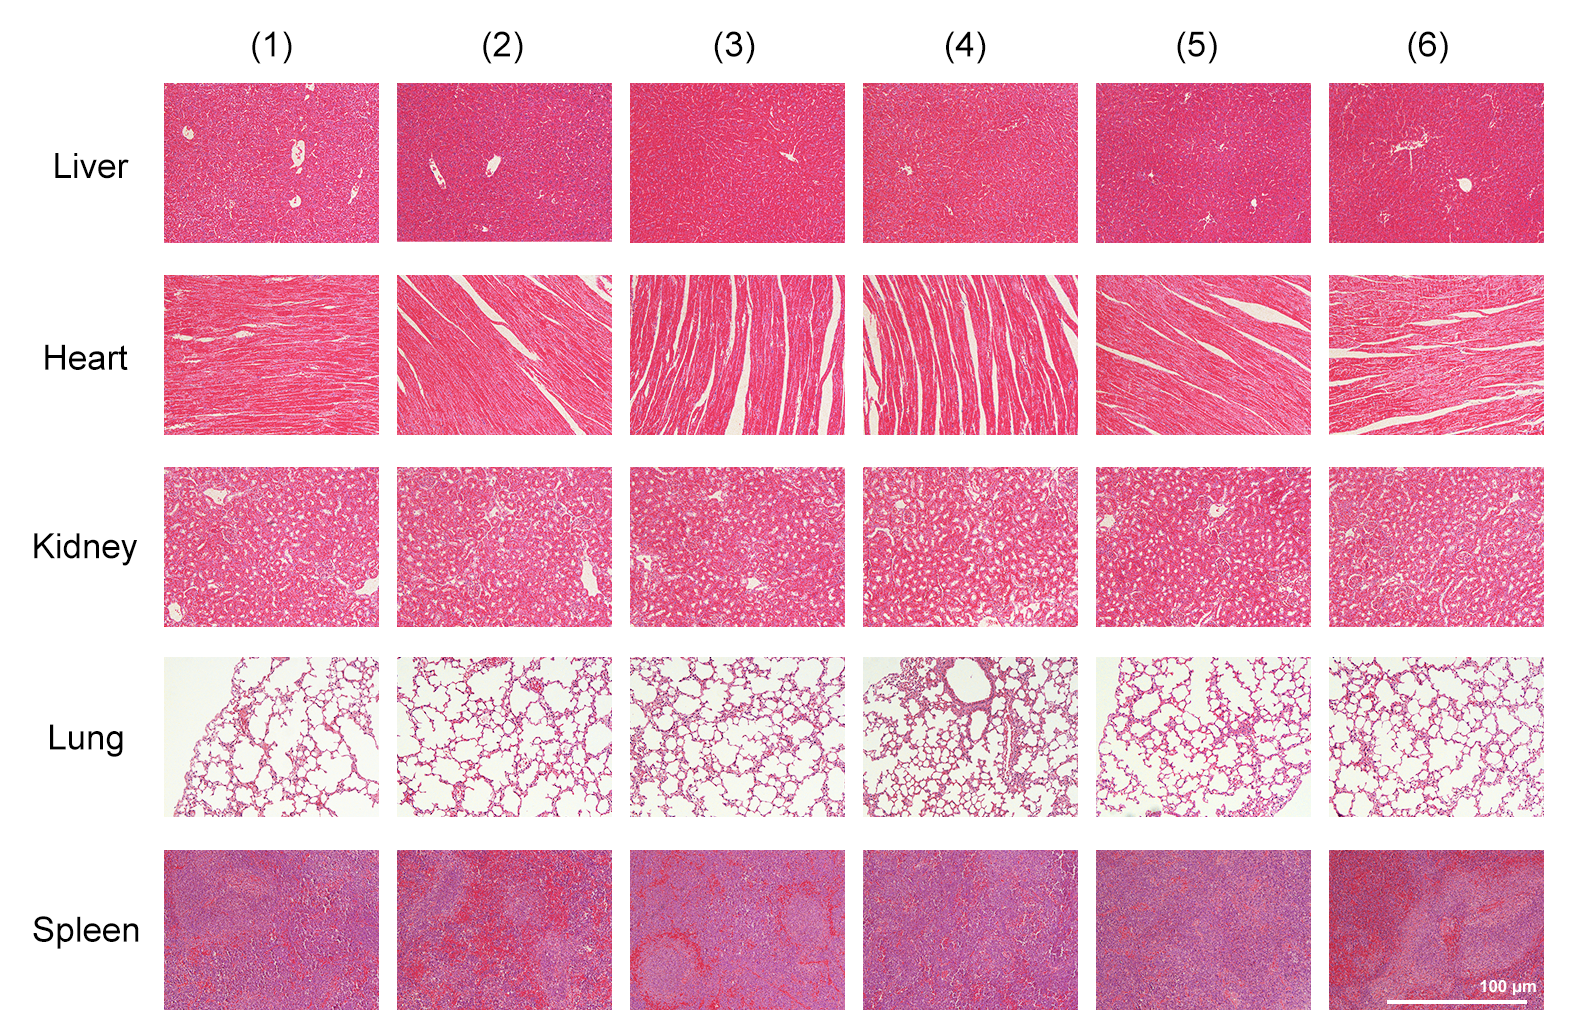


**Supplementary Fig. 21**. The tissue images of the heart, liver, spleen, lungs, and kidneys of representative mice in each group after the 14 days of treatment, dissected, sliced, and stained with H&E.

**3. Supplementary Tables**

Supplementary Table 1. The Ce, Mo, and Fe contents in CM@MIL@PZS-3.2 (15 wt%) catalysts measured by ICP-OES.

| Name | w(Ce) | w(Mo) | w(Fe) |
| --- | --- | --- | --- |
| Cu,Co@MIL(Fe) | 22% | 17% | 25% |

Supplementary Table 2. EXAFS results of Mo. An E0 value of 20000.0 eV was used to calibrate all data with respect to the first inflection point of the absorption K-edge of Mo foil. S02 was set to 0.944.

| Sample | Path | C.N.[b] | R (Å)[c] | σ2×103 (Å2)[d] | ΔE0 (eV)[e] | R-factor[f] |
| --- | --- | --- | --- | --- | --- | --- |
| Mo Foil | Mo-Mo | 8*[a] | 2.74±0.02 | 3.8±0.4 | -5.4±0.8 | 0.005 |
| Mo-Mo | 6*[a] | 3.17±0.02 | 3.7±0.5 |
| CMF HESACs | Mo-O1 | 3.2±0.4 | 1.66±0.03 | 4.2±1.5 | 9.7±4.1 | 0.019 |
| Mo-O2 | 1.6±0.5 | 1.86±0.04 |
| Mo-Mo | 4.3±1.2 | 2.55±0.06 | 6.2±2.4 |
| MoO3 | Mo-O1 | 3.6±0.7 | 1.72±0.02 | 4.6±1.3 | -4.4±1.4 | 0.004 |
| Mo-O2 | 3.4±0.9 | 1.94±0.01 |
| Mo-Mo | 7.2±2.1 | 3.51±0.04 | 9.3±2.2 |
| Mo-Mo | 5.3±1.6 | 3.81±0.05 |

Note: [a]* indicates the coordination number was fixed. [b] C.N. is the coordination number. [c] R is the interatomic distance between absorber and backscatter atom. [d] σ2 is the Debye-Waller factor to account for both thermal and structural disorders. [e] ΔE0 is the inner potential correction. [f] R factor is used to value the goodness of the fit.Supplementary Table 3. EXAFS results of Ce. S0² was set to 0.99.

| Sample | Path | C.N.[b] | R (Å)[c] | σ²×103 (Å2)[d] | ΔE0 (eV)[e] | R-factor[f] |
| --- | --- | --- | --- | --- | --- | --- |
| CeO2 | Ce-O | 8*[a] | 2.34±0.02 | 0.0086 | 6.7±0.9 | 0.0169 |
| Ce Sample | Ce-O | 6*[b] | 2.42±0.05 | 0.0111 | -1.2±2.4 | 0.0222 |

Note: [a]* indicates the coordination number was fixed. [b] C.N. is the coordination number. [c] R is the interatomic distance between absorber and backscatter atom. [d] σ² is the Debye-Waller factor to account for both thermal and structural disorders. [e] ΔE0 is the inner potential correction. [f] R factor is used to value the goodness of the fit.
